# Supplementary material for: Total synthesis of highly oxygenated phomopsol B via acid-induced etherification to construct a bridged structure
Source: Royal Society of Chemistry journal article supplement (doi:10.1039/d3cc05130g), 2023-11-18

## Supporting Information

### Total Synthesis of Highly Oxygenated Phomopsol B via Acid-Induced Etherification to Construct Bridged Structure

Yuichiro Kawamoto\*, Ayaka Nishitani, Yukari Yoshimura, Toyoharu Kobayashi,  
and Hisanaka Ito\*

*School of Life Sciences, Tokyo University of Pharmacy and Life Sciences  
1432-1 Horinouchi, Hachioji, Tokyo 192-0392, Japan.*

ykawa@toyaku.ac.jp

itohisa@toyaku.ac.jp

#### Table of Contents

|                                                                            |     |
|----------------------------------------------------------------------------|-----|
| Experimental procedure                                                     | S1  |
| <sup>1</sup> H and <sup>13</sup> C NMR spectra of new compounds            | S16 |
| X-ray single-crystal diffraction data for compounds <b>16</b>              | S34 |
| NOESY spectra of compounds <b>S5</b> , <b>S5'</b> , <b>2</b> and <b>2'</b> | S41 |

## General

All reactions involving air- and moisture-sensitive reagents were carried out using standard syringe-septum cap techniques. Unless otherwise noted, all solvents and reagents were obtained from commercial suppliers and used without further purification. Routines monitoring of reactions were carried out Merck silica gel 60 F254 TLC plates. Column chromatography was performed on Kanto Chemical Silica Gel 60N (spherical, neutral 60–230  $\mu\text{m}$ ) with the solvents indicated. Melting points were taken on a Yanako MP-S3 micro melting point apparatus and are uncorrected.  $^1\text{H}$  and  $^{13}\text{C}$  NMR spectra were measured with a JASCO EZC 400S (400 MHz) spectrometer. Chemical shifts were expressed in ppm using  $\text{CHCl}_3$  (7.26 ppm for  $^1\text{H}$  NMR, 77.0 ppm for  $^{13}\text{C}$  NMR) in  $\text{CDCl}_3$  and  $\text{CH}_3\text{OH}$  (3.31 ppm for  $^1\text{H}$  NMR, 49.0 ppm for  $^{13}\text{C}$  NMR) in  $\text{CD}_3\text{OD}$  as internal standard. Infrared spectral measurements were carried out with a JASCO FT/IR-4700 and only noteworthy absorptions were listed. HRMS spectra measured on a Micromass LCT spectrometer. Oil bath was used in reactions that require heating and each temperature indicates oil bath temperature.

## Experimental procedure

synthetic scheme of known compound **8**

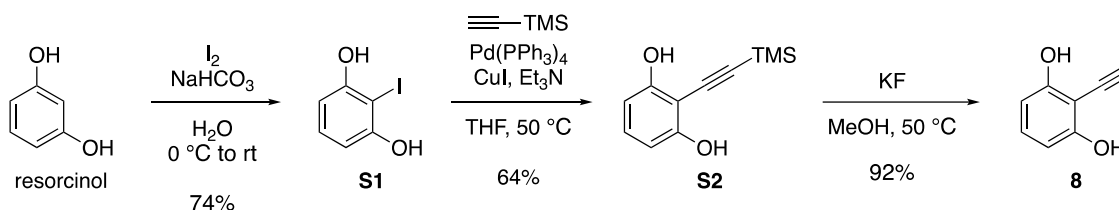

2-iodobenzene-1,3-diol (**S1**)

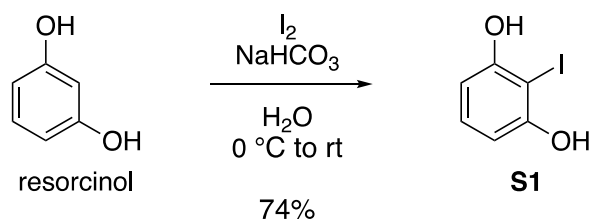

To a stirred solution of resorcinol (5.00 g, 45.5 mmol) in  $\text{H}_2\text{O}$  (50 mL) were added  $\text{I}_2$  (17.3 g, 68.1

mmol) and NaHCO<sub>3</sub> (4.20 g, 50.0 mmol) at 0 °C under Ar atmosphere, and the mixture was stirred for 1 h at room temperature. The reaction mixture was extracted with AcOEt (twice). The combined organic layers were washed with brine, dried over MgSO<sub>4</sub> and concentrated in vacuo. The resulting residue was purified by silica gel column chromatography (AcOEt, 100%) to afford **S1** (7.94 g, 74%) as a white solid.

<sup>1</sup>H NMR (400 MHz, CDCl<sub>3</sub>) δ 5.28 (s, 2H), 6.56 (d, J = 8.2 Hz, 2H), 7.11 (t, J = 8.2 Hz, 1H).

#### 2-((trimethylsilyl)ethynyl)benzene-1,3-diol (**S2**)

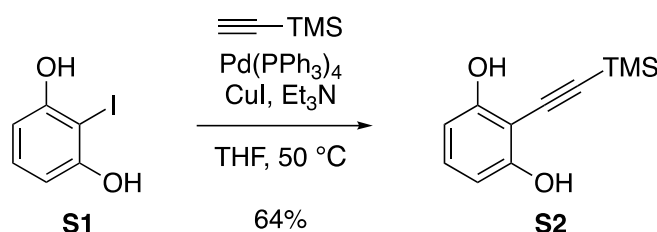

To a stirred solution of **S1** (3.00 g, 12.7 mmol) in THF (90 mL) were added CuI (483 mg, 2.54 mmol), Pd(PPh<sub>3</sub>)<sub>4</sub> (1.00 g, 0.865 mmol), trimethylsilylacetylene (3.80 mL, 26.9 mmol) and Et<sub>3</sub>N (8.80 mL, 63.1 mmol) at room temperature under Ar atmosphere, and the mixture was stirred for 12 h at 50 °C. The reaction mixture was quenched with sat. NH<sub>4</sub>Cl aq. and extracted with AcOEt (twice). The combined organic layers were washed with brine, dried over MgSO<sub>4</sub> and concentrated in vacuo. The resulting residue was purified by silica gel column chromatography (Hexane-AcOEt, 7:1) to afford **S2** (1.69 g, 64%) as a brown solid.

<sup>1</sup>H NMR (400 MHz, CDCl<sub>3</sub>) δ 0.30 (s, 9H), 5.58 (s, 2H), 6.51 (d, J = 8.2 Hz, 2H), 7.12 (t, J = 8.2 Hz, 1H).

#### 2-ethynylbenzene-1,3-diol (**8**)

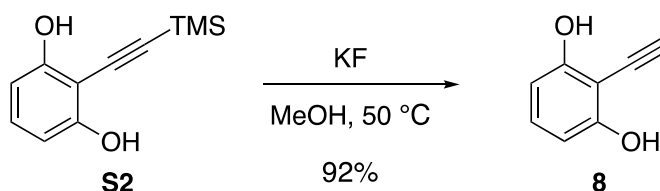

To a stirred solution of **S2** (1.32 g, 6.40 mmol) in MeOH (140 mL) was added KF (744 mg, 12.8 mmol) at room temperature, and the mixture was stirred for 0.5 h at 50 °C. The reaction mixture

was quenched with sat.  $\text{NH}_4\text{Cl}$  aq. and extracted with AcOEt (twice). The combined organic layers were washed with brine, dried over  $\text{MgSO}_4$  and concentrated in vacuo. The resulting residue was purified by silica gel column chromatography (Hexane-AcOEt, 3:1) to afford **8** (790 mg, 92%) as a brown solid.

$^1\text{H}$  NMR (400 MHz,  $\text{CDCl}_3$ )  $\delta$  3.81 (s, 1H), 5.61 (s, 2H), 6.52 (d,  $J = 8.2$  Hz, 2H), 7.15 (t,  $J = 8.2$  Hz, 1H).

#### 2-ethynyl-1,3-phenylene diacetate (**9**)

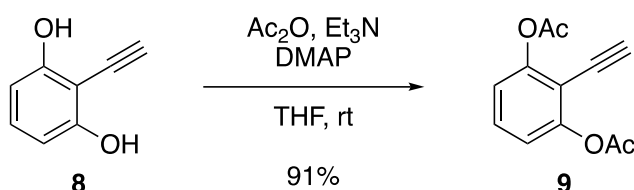

To a stirred solution of **8** (578 mg, 4.31 mmol) in THF (10 mL) were added DMAP (105 mg, 0.859 mmol),  $\text{Ac}_2\text{O}$  (1.60 mL, 16.9 mmol) and  $\text{Et}_3\text{N}$  (1.20 mL, 8.61 mmol) at room temperature under Ar atmosphere, and the mixture was stirred for 20 min at the same temperature. The reaction mixture was quenched with  $\text{H}_2\text{O}$  and extracted with AcOEt (twice). The combined organic layers were washed with brine, dried over  $\text{MgSO}_4$  and concentrated in vacuo. The resulting residue was purified by silica gel column chromatography (Hexane-AcOEt, 3:1) to afford **9** (854 mg, 91%) as a white solid.

m.p. 105-108  $^\circ\text{C}$ ; IR (KBr) 3282, 1770, 1607, 1456, 1025, 903, 830, 745, 664  $\text{cm}^{-1}$ ;  $^1\text{H}$  NMR (400 MHz,  $\text{CDCl}_3$ )  $\delta$  2.34 (s, 6H), 3.41 (s, 1H), 7.03 (d,  $J = 8.2$  Hz, 2H), 7.37 (t,  $J = 8.2$  Hz, 1H);  $^{13}\text{C}$  NMR (100 MHz,  $\text{CDCl}_3$ )  $\delta$  20.8(2C), 85.6(2C), 119.9(3C), 129.7(2C), 152.9(2C), 168.5(2C); HRMS (ESI-TOF) Calcd for  $\text{C}_{12}\text{H}_{10}\text{O}_4\text{Na}$   $[\text{M}+\text{Na}]^+$  241.0471. Found 241.0475.

#### 2-(3-(((*tert*-butyldimethylsilyl)oxy)methyl)but-3-en-1-yn-1-yl)-1,3-phenylene diacetate (**11**)

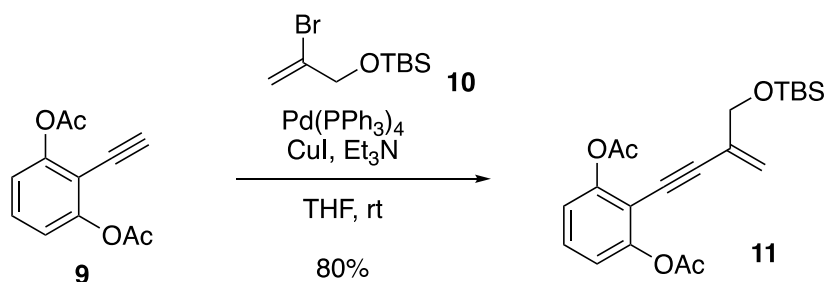

To a stirred solution of **9** (1.41 g, 6.46 mmol) in THF (30 mL) were added CuI (246 mg, 1.29 mmol), Pd(PPh<sub>3</sub>)<sub>4</sub> (523 mg, 0.453 mmol), **10** (1.90 g, 7.76 mmol) and Et<sub>3</sub>N (2.70 mL, 19.4 mmol) at room temperature under Ar atmosphere, and the mixture was stirred for 10 min at the same temperature. The reaction mixture was quenched with sat. NH<sub>4</sub>Cl aq. and extracted with AcOEt (twice). The combined organic layers were washed with brine, dried over MgSO<sub>4</sub> and concentrated in vacuo. The resulting residue was purified by silica gel column chromatography (Hexane-AcOEt, 7:1) to afford **11** (2.03 g, 81%) as a yellow oil.

IR (neat) 2930, 2857, 1775, 1604, 1460, 1369, 1186, 1113, 1029, 838 779, cm<sup>-1</sup>; <sup>1</sup>H NMR (400 MHz, CDCl<sub>3</sub>) δ 0.10 (s, 6H), 0.93 (s, 9H), 2.32 (s, 6H), 4.20 (s, 2H), 5.53 (s, 1H), 5.70 (s, 1H), 7.02 (d, J = 8.2 Hz, 2H), 7.34 (t, J = 8.2 Hz, 1H); <sup>13</sup>C NMR (100 MHz, CDCl<sub>3</sub>) δ -5.7 (2C), 18.1, 20.4 (2C), 25.5(3C), 64.3, 80.1, 96.3, 111.9, 119.5(2C), 119.9, 128.8, 130.1, 151.9(2C), 168.1 (2C); HRMS (ESI-TOF) Calcd for C<sub>21</sub>H<sub>28</sub>O<sub>5</sub>NaSi [M+Na]<sup>+</sup> 411.1598. Found 411.1597.

2-((2-(((*tert*-butyldimethylsilyl)oxy)methyl)oxiran-2-yl)ethynyl)-1,3-phenylene diacetate (**12**)

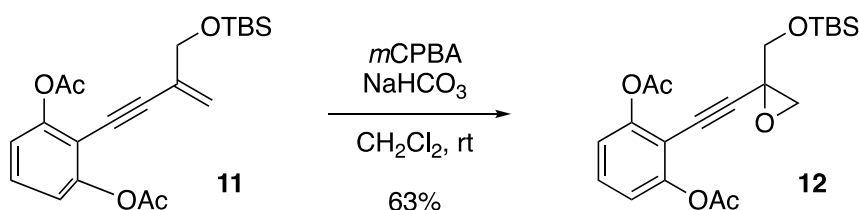

To a stirred solution of **11** (1.67 g, 4.29 mmol) in CH<sub>2</sub>Cl<sub>2</sub> (25 mL) were added *m*CPBA (2.20 g, 12.7 mmol) and NaHCO<sub>3</sub> (2.20 g, 26.2 mmol) at room temperature under Ar atmosphere, and the mixture was stirred for 2 h at the same temperature. The reaction mixture was quenched with sat. NaHCO<sub>3</sub> aq. and filtrated with celite (CHCl<sub>3</sub>), and then extracted with CHCl<sub>3</sub> (twice). The combined organic layers were washed with brine, dried over MgSO<sub>4</sub> and concentrated in vacuo. The resulting residue was purified by silica gel column chromatography (Hexane-AcOEt, 5:1) to afford **12** (1.08 g, 63%) as a yellow oil.

IR (KBr) 2930, 2857, 1777, 1608, 1461, 1370, 1117, 1030, 838, 781 cm<sup>-1</sup>; <sup>1</sup>H NMR (400 MHz, CDCl<sub>3</sub>) δ 0.08 (d, J = 4.6 Hz, 6H) 0.89 (s, 9H), 2.32 (s, 6H), 2.99 (d, J = 5.9 Hz, 1H), 3.12 (d, J = 6.4 Hz, 1H), 3.93 (dd, J = 21.5, 11.9 Hz, 2H), 7.01 (d, J = 8.2 Hz, 2H), 7.35 (t, J = 8.2 Hz, 1H); <sup>13</sup>C NMR (100 MHz, CDCl<sub>3</sub>) δ -5.45, -5.37, 18.3, 20.8(2C), 25.8(3C), 51.3, 63.5, 74.2, 95.5, 111.2, 119.8(2C), 129.6, 152.6(2C), 168.4(2C); HRMS (ESI-TOF) Calcd for C<sub>21</sub>H<sub>28</sub>O<sub>6</sub>NaSi [M+Na]<sup>+</sup> 427.1547. Found 427.1547.

Asymmetric epoxidation using the corresponding allyl alcohol (removed TBS group) was attempted, but it resulted in unsatisfactory yield and poor enantioselectivity.

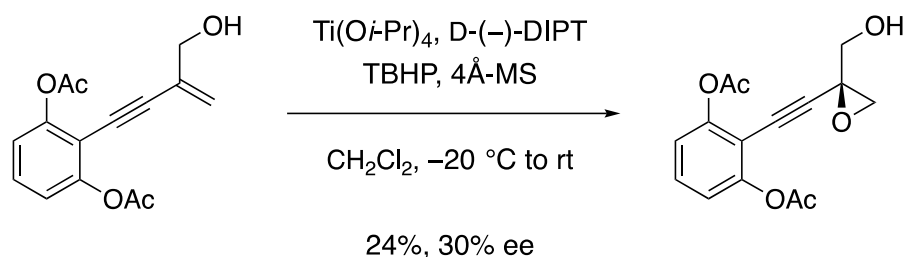

2-(((*tert*-butyldimethylsilyl)oxy)methyl)-2-(hydroxymethyl)-2*H*-chromen-5-ol (**14**)

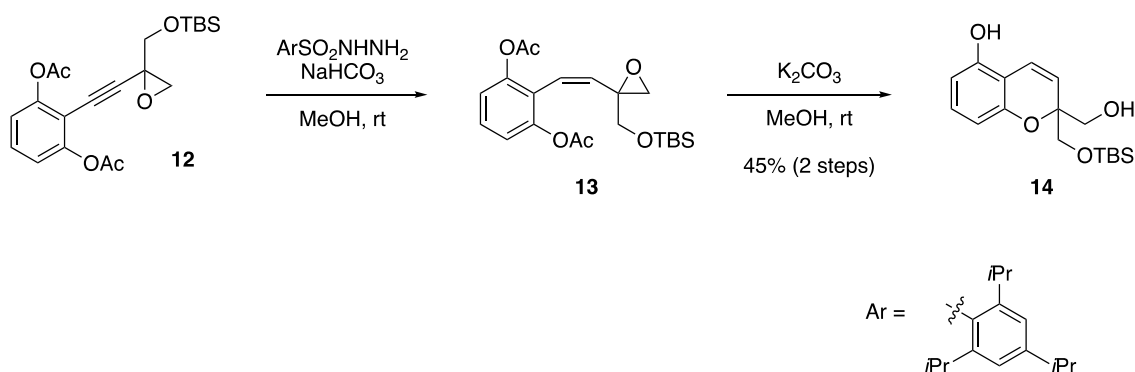

To a stirred solution of **12** (970 mg, 2.40 mmol) in MeOH (10 mL) were added  $\text{ArSO}_2\text{NHNH}_2$  (2.15 g, 7.20 mmol) and  $\text{NaHCO}_3$  (670 mg, 7.92 mmol) at room temperature under Ar atmosphere, and the mixture was stirred for 3 h at the same temperature. The reaction mixture was quenched with sat.  $\text{NaHCO}_3$  aq. and extracted with AcOEt (twice). The combined organic layers were washed with brine, dried over  $\text{MgSO}_4$  and concentrated in vacuo. The resulting residue was purified by silica gel column chromatography (Hexane-AcOEt, 5:1) to afford **13** (695 mg, including impurities) as a yellow oil.

To a stirred solution of **13** in MeOH (10 mL) was added  $\text{K}_2\text{CO}_3$  (920 mg, 6.66 mmol) at room temperature under Ar atmosphere, and the mixture was stirred for 0.5 h at the same temperature. The reaction mixture was quenched with  $\text{H}_2\text{O}$  and extracted with AcOEt (twice). The combined organic layers were washed with brine, dried over  $\text{MgSO}_4$  and concentrated in vacuo. The resulting residue was purified by silica gel column chromatography (Hexane-AcOEt, 3:1) to afford **14** (276 mg, 45% in 2 steps) as a yellow oil.

IR (neat) 3347, 2929, 2857, 1635 1586, 1462, 1257, 1085, 838, 755, 667  $\text{cm}^{-1}$ ;  $^1\text{H}$  NMR (400 MHz,  $\text{CDCl}_3$ )  $\delta$  0.04 (d,  $J = 10.1$  Hz, 6H), 0.88 (s, 9H), 2.57 (s, 1H), 3.73 (d,  $J = 10.5$  Hz, 1H), 3.86-3.83 (m, 3H), 5.60 (d,  $J = 10.1$  Hz, 1H), 6.31 (d,  $J = 7.8$  Hz, 1H), 6.39 (d,  $J = 8.2$  Hz, 1H), 6.83 (d,  $J = 10.1$  Hz, 1H), 6.92 (t,  $J = 8.0$  Hz, 1H);  $^{13}\text{C}$  NMR (100 MHz,  $\text{CDCl}_3$ )  $\delta$  -5.24, -5.20, 18.5, 26.1(3C), 65.5, 65.7, 80.6, 108.5, 109.1, 109.7, 120.2, 122.2, 129.6, 152.0, 153.7; HRMS (ESI-TOF) Calcd for  $\text{C}_{17}\text{H}_{26}\text{O}_4\text{NaSi}$   $[\text{M}+\text{Na}]^+$  345.1493. Found 345.1493.

(2*S*,3*R*,4*R*)-2-(((*tert*-butyldimethylsilyl)oxy)methyl)-2-(hydroxymethyl)chromane-3,4,5-triol  
(**15**)

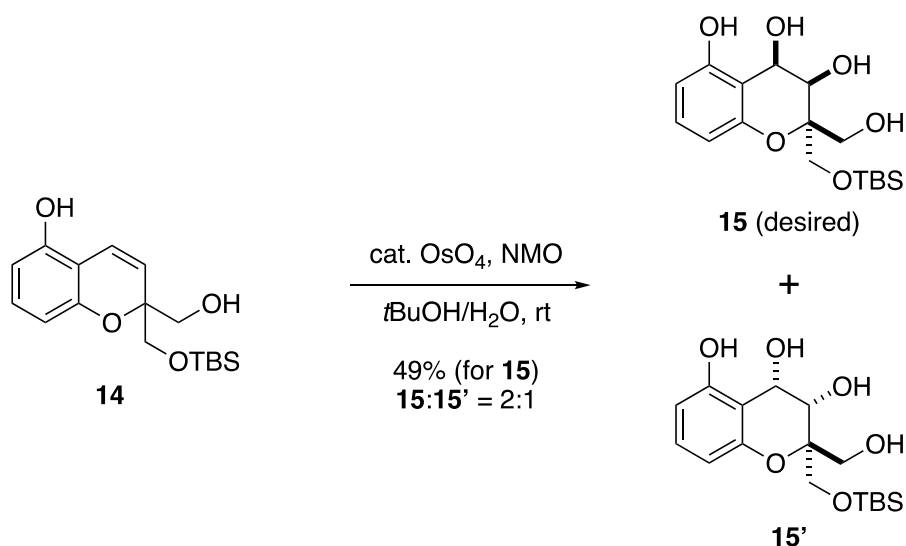

To a stirred solution of **14** (773 mg, 2.39 mmol) in *t*BuOH (15 mL)/ $\text{H}_2\text{O}$  (5 mL) were added NMO (843 mg, 7.19 mmol) and  $\text{OsO}_4$  (4% in  $\text{H}_2\text{O}$ , 0.300 mL, 0.0539 mmol) at room temperature under Ar atmosphere, and the mixture was stirred for 12 h at the same temperature. The reaction mixture was quenched with sat.  $\text{Na}_2\text{S}_2\text{O}_3$  aq. and extracted with  $\text{CHCl}_3$  (twice). The combined organic layers were washed with brine, dried over  $\text{MgSO}_4$  and concentrated in vacuo. The resulting residue was purified by silica gel column chromatography (Hexane-AcOEt, 1:1) to afford **15** (420 mg, 49%) as a yellow oil and **15'** as a yellow oil.

Data for **15**

IR (neat) 3365, 2929, 2857, 1590, 1470, 1390, 1255, 1033, 837, 780, 667  $\text{cm}^{-1}$ ;  $^1\text{H}$  NMR (400 MHz,  $\text{CDCl}_3$ )  $\delta$  0.03 (d,  $J = 11.4$  Hz, 6H), 0.87 (s, 9H), 3.61 (d,  $J = 10.5$  Hz, 1H), 3.71 (d,  $J = 11.0$  Hz, 1H), 3.93 (d,  $J = 12.3$  Hz, 1H), 4.11 (d,  $J = 12.3$  Hz, 1H), 4.34 (d,  $J = 4.6$  Hz, 1H), 5.02 (d,  $J = 4.6$  Hz, 1H), 6.39 (d,  $J = 8.2$  Hz, 1H), 6.50 (d,  $J = 7.8$  Hz, 1H), 7.07 (t,  $J = 8.2$  Hz, 1H);  $^{13}\text{C}$

NMR (100 MHz, CDCl<sub>3</sub>)  $\delta$  -5.69, -5.67, 18.0, 25.7(3C), 63.7, 64.6, 65.3, 67.0, 79.2, 107.9, 108.2, 109.4, 130.1, 152.6, 158.1; HRMS (ESI-TOF) Calcd for C<sub>17</sub>H<sub>28</sub>O<sub>6</sub>NaSi [M+Na]<sup>+</sup> 379.1547. Found 379.1544.

Data for **15'**

IR (neat) 3347, 2930, 2857, 1591, 1469, 1391, 1255, 1031, 836, 779, 667 cm<sup>-1</sup>; <sup>1</sup>H NMR (400 MHz, CDCl<sub>3</sub>)  $\delta$  -0.04 (s, 3H), 0.09 (s, 3H), 0.83 (s, 9H), 1.80 (d, J = 26.5 Hz, 1H), 2.40 (d, J = 23.3 Hz, 1H), 3.49-3.45 (m, 1H), 3.65 (d, J = 11.9 Hz, 1H), 3.77 (d, J = 11.9 Hz, 1H), 4.01 (s, 2H), 4.26 (s, 2H), 4.96 (s, 1H), 6.38 (d, J = 8.2 Hz, 1H), 6.48 (dd, J = 8.2, 1.8 Hz, 1H), 7.06 (td, J = 8.1, 2.6 Hz, 1H); <sup>13</sup>C NMR (100 MHz, CDCl<sub>3</sub>)  $\delta$  -6.21, -6.16, 17.8 25.3(3C), 63.0, 64.0, 64.1, 66.5, 78.7, 108.0, 108.3, 108.6, 129.8, 152.7, 157.0; HRMS (ESI-TOF) Calcd for C<sub>17</sub>H<sub>28</sub>O<sub>6</sub>NaSi [M+Na]<sup>+</sup> 379.1547. Found 379.1547.

Hydroxyl group-directed epoxidation with compound **14** was also conducted, but low yield. In addition, exposure of the corresponding epoxide to some Lewis acids failed to construct the desired bridged structure.

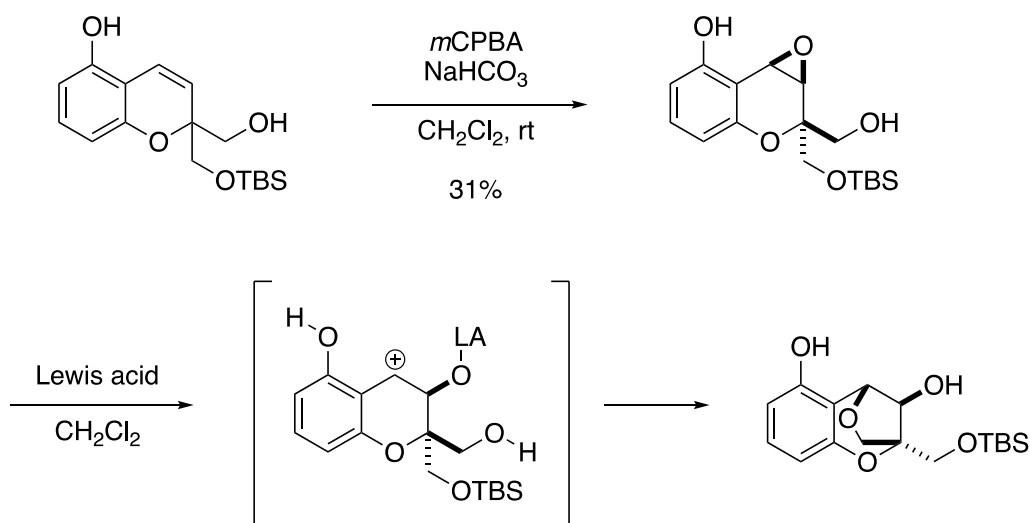

| entry | Lewis acid                        | temp.        | result        |
|-------|-----------------------------------|--------------|---------------|
| 1     | BF <sub>3</sub> ·OEt <sub>2</sub> | -78 °C       | decomposition |
| 2     | TiCl <sub>4</sub>                 | -78 °C       | decomposition |
| 3     | AlCl <sub>3</sub>                 | -78 °C to rt | no reaction   |
| 4     | BCl <sub>3</sub>                  | -78 °C to rt | no reaction   |



(2*S*,5*R*,10*R*)-2-(((*tert*-butyldimethylsilyl)oxy)methyl)-2,3-dihydro-5*H*-2,5-methanobenzo[*e*][1,4]dioxepine-6,10-diol (**15**)

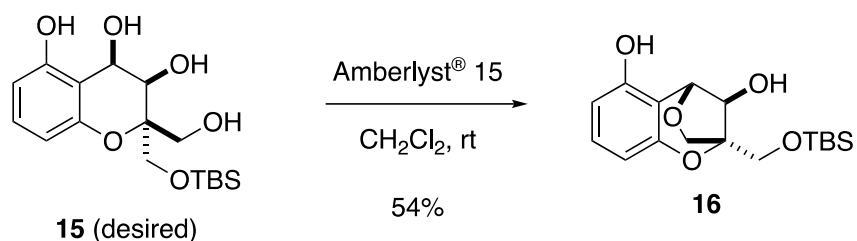

To a stirred solution of **15** (24.1 mg, 0.0670 mmol) in  $\text{CH}_2\text{Cl}_2$  (2 mL) was added Amberlyst 15 (6.5 mg) at room temperature under Ar atmosphere, and the mixture was stirred for 19 h at the same temperature. The insoluble material was removed by filtration, and the filtrate was concentrated in vacuo. The resulting residue was purified by silica gel column chromatography (Hexane-AcOEt, 2:1) to afford **16** (12.2 mg, 54%) as a white solid.

m.p. 155-160 °C; IR (KBr) 3400, 2928, 2858, 1472, 1248, 1214, 1100 1033, 838, 780, 669  $\text{cm}^{-1}$ ;  $^1\text{H}$  NMR (400 MHz,  $\text{CDCl}_3$ )  $\delta$  0.14 (s, 6H), 0.92 (s, 9H), 3.22 (d,  $J = 4.6$  Hz, 1H), 4.06 (d,  $J = 11.4$  Hz, 1H), 4.23-4.13 (m, 3H), 4.49 (d,  $J = 4.1$  Hz, 1H), 5.19 (s, 1H), 5.43 (s, 1H), 6.34 (q,  $J = 8.4$  Hz, 2H), 7.01 (t,  $J = 8.0$  Hz, 1H);  $^{13}\text{C}$  NMR (100 MHz,  $\text{CDCl}_3$ )  $\delta$  -5.43, -5.37, 18.3, 25.8(3C), 62.8, 73.6, 74.1(2C), 87.1, 108.0, 108.2, 111.4, 130.5, 152.9, 154.0; HRMS (ESI-TOF) Calcd for  $\text{C}_{17}\text{H}_{26}\text{O}_5\text{NaSi}$   $[\text{M}+\text{Na}]^+$  361.1442 Found 361.1441.

The structure of compound **16** was determined by X-ray crystallographic analysis (CCDC2298603, see page 34)

((*2R*,5*R*,10*R*)-6,10-bis(methoxymethoxy)-5*H*-2,5-methanobenzo[*e*][1,4]dioxepin-2(3*H*)-yl)methyl(*tert*-butyl)dimethylsilane (**S3**)

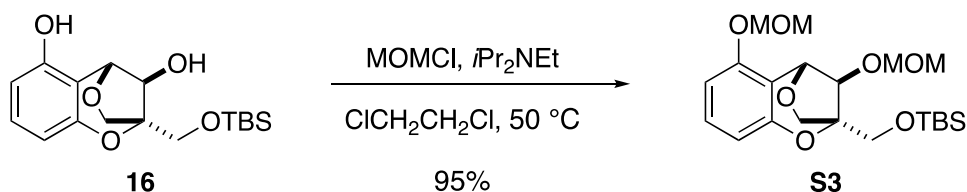

To a stirred solution of **16** (29.5 mg, 0.0870 mmol) in  $\text{CICH}_2\text{CH}_2\text{Cl}$  (3 mL) were added MOMCl

(0.200 mL, 2.63 mmol) and *i*Pr<sub>2</sub>NEt (0.400 mL, 2.35 mmol) at 50 °C under Ar atmosphere, and the mixture was stirred for 12 h at the same temperature. The reaction mixture was quenched with H<sub>2</sub>O and extracted with CHCl<sub>3</sub> (twice). The combined organic layers were washed with brine, dried over MgSO<sub>4</sub> and concentrated in vacuo. The resulting residue was purified by silica gel column chromatography (Hexane-AcOEt, 3:1) to afford **14** (35.2 mg, 95%) as a yellow oil.

IR (neat) 2952, 2856, 1607, 1461, 1258, 1217, 1105, 1043, 838, 778, 675 cm<sup>-1</sup>; <sup>1</sup>H-NMR (400 MHz, CDCl<sub>3</sub>) δ 0.12 (d, J = 3.4 Hz, 6H), 0.90 (s, 9H), 3.47 (d, J = 15.6 Hz, 6H), 4.00-3.95 (m, 2H), 4.11 (q, J = 10.8 Hz, 2H), 4.48 (s, 1H), 4.85 (s, 2H), 5.18 (dd, J = 10.5, 6.9 Hz, 2H), 5.33 (s, 1H), 6.46 (d, J = 8.2 Hz, 1H), 6.62 (d, J = 7.8 Hz, 1H), 7.09 (t, J = 8.2 Hz, 1H); <sup>13</sup>C NMR (100 MHz, CDCl<sub>3</sub>) δ -5.58 -5.34, 18.0, 25.5(3C), 55.4, 56.0, 61.5, 71.6, 74.2, 76.0, 88.5, 94.6, 94.9, 106.2, 109.1, 113.6, 130.1, 153.7, 153.9; HRMS (ESI-TOF) Calcd for C<sub>21</sub>H<sub>34</sub>O<sub>7</sub>NaSi [M+Na]<sup>+</sup> 449.1966. Found 449.1969.

((2*R*,5*R*,10*R*)-6,10-bis(methoxymethoxy)-5*H*-2,5-methanobenzo[*e*][1,4]dioxepin-2(3*H*-yl)methanol (**19**))

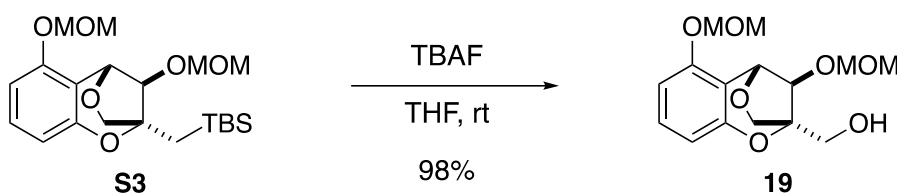

To a stirred solution of **S3** (59.0 mg, 0.138 mmol) in THF (3 mL) was added TBAF (1.00 M in THF, 0.270 mL, 0.270 mmol) at room temperature under Ar atmosphere, and the mixture was stirred for 1 h at the same temperature. The reaction mixture was quenched with sat. NH<sub>4</sub>Cl aq. and extracted with AcOEt (twice). The combined organic layers were washed with brine, dried over MgSO<sub>4</sub> and concentrated in vacuo. The resulting residue was purified by silica gel column chromatography (Hexane-AcOEt, 1:1) to afford **14** (42.0 mg, 98%) as a yellow oil.

IR (neat) 3453, 2949, 2827 1607, 1478, 1269, 1216, 1043, 854, 779, 673 cm<sup>-1</sup>; <sup>1</sup>H-NMR (400 MHz, CDCl<sub>3</sub>) δ 2.43 (dd, J = 8.2, 5.5 Hz, 1H), 3.48 (d, J = 9.6 Hz, 6H), 4.07-3.93 (m, 3H), 4.16 (d, J = 10.5 Hz, 1H), 4.51 (s, 1H), 4.86 (dd, J = 22.0, 6.4 Hz, 2H), 5.18 (s, 2H), 5.38 (s, 1H), 6.49 (d, J = 8.2 Hz, 1H), 6.66 (d, J = 8.2 Hz, 1H), 7.11 (t, J = 8.2 Hz, 1H); <sup>13</sup>C NMR (100 MHz, CDCl<sub>3</sub>) δ 55.8, 56.3, 61.0, 71.8, 74.1, 77.1, 88.4, 94.9, 95.5, 107.1, 109.5, 113.8, 130.6, 153.7, 154.1; HRMS (ESI-TOF) C<sub>15</sub>H<sub>20</sub>O<sub>7</sub>Na [M+Na]<sup>+</sup> 335.1101. Found 335.1102.

(2*R*,5*R*,10*R*)-6,10-bis(methoxymethoxy)-5*H*-2,5-methanobenzo[*e*][1,4]dioxepine-2(3*H*)-carbaldehyde (**20**)

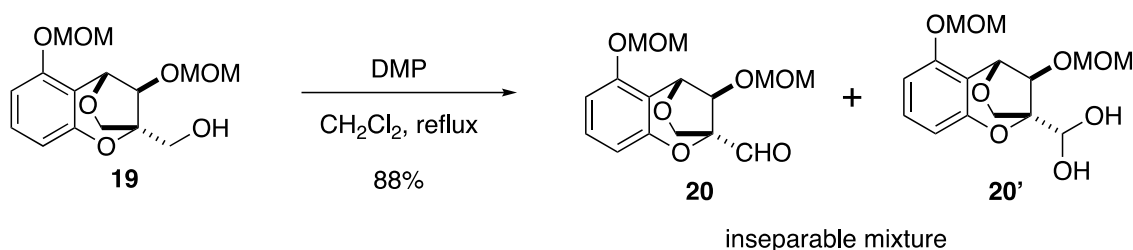

To a stirred solution of **19** (16.0 mg, 0.0512 mmol) in CH<sub>2</sub>Cl<sub>2</sub> (1 mL) was added Dess-Martin Periodinane (DMP) (10% in CH<sub>2</sub>Cl<sub>2</sub>, 0.600 ml, 0.0600 mmol) at 40 °C (reflux) under Ar atmosphere, and the mixture was stirred for 1 h at the same temperature. The reaction mixture was quenched with sat. Na<sub>2</sub>S<sub>2</sub>O<sub>3</sub> aq./sat. NaHCO<sub>3</sub> aq. (2:3) and extracted with CHCl<sub>3</sub> (twice). The combined organic layers were washed with brine, dried over MgSO<sub>4</sub> and concentrated in vacuo. The resulting residue was purified by silica gel column chromatography (Hexane-AcOEt, 1:1) to afford an inseparable mixture of **20** and hydrated product **20'** (13.6 mg, 88%) as a yellow oil.

IR (neat) 3433, 2951, 1737, 1592, 1479, 1257, 1217, 1039, 853, 776 cm<sup>-1</sup>; <sup>1</sup>H NMR (400 MHz, CDCl<sub>3</sub>) δ 3.50-3.41 (m, 6H), 4.31-3.97 (m, 2H), 4.92-4.45 (m, 3H), 5.48-5.17 (m, 3H), 6.72-6.43 (m, 2H), 7.18-7.08 (m, 1H), 9.92 (s, 0.3H); <sup>13</sup>C NMR (100 MHz, CDCl<sub>3</sub>) δ 55.9, 56.0, 56.3, 72.4, 73.2, 78.6, 88.3, 89.8, 94.9, 95.4, 106.9, 107.7, 109.6, 113.1, 130.6, 131.0, 152.5, 154.1, 154.2, 194.7; HRMS (ESI-TOF) C<sub>15</sub>H<sub>18</sub>O<sub>7</sub>Na [M+Na]<sup>+</sup> 333.0945. Found 333.0947.

(1*S*,2*S*)-1-((2*S*,5*R*,10*R*)-6,10-bis(methoxymethoxy)-5*H*-2,5-methanobenzo[*e*][1,4]dioxepin-2(3*H*)-yl)-2-methylbut-3-en-1-ol (**21**)

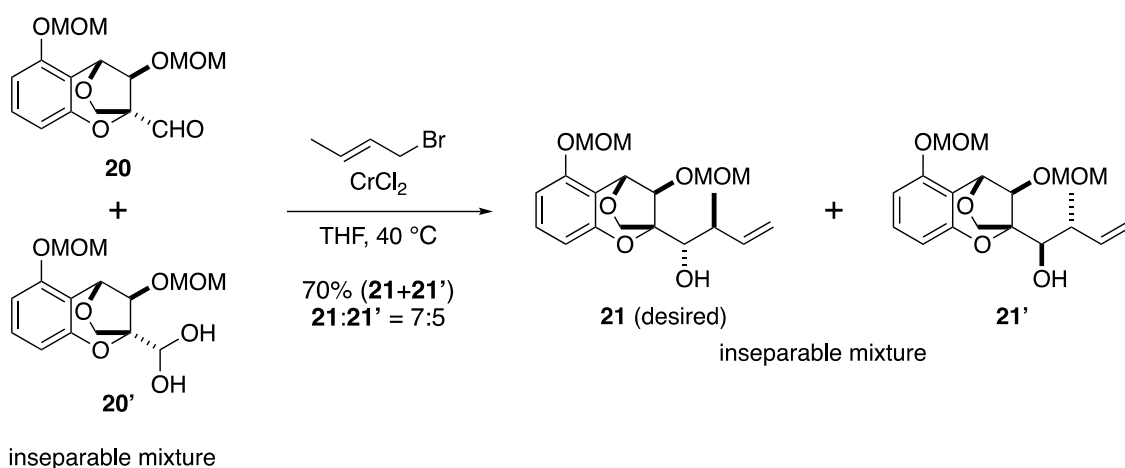

To a stirred solution of  $\text{CrCl}_2$  (70.0 mg, 0.570 mmol) in THF (1 mL) were added the inseparable mixture of **20** and hydrated product **20'** (14.4 mg, 0.0464 mmol) and crotylbromide (30.0  $\mu\text{L}$ , 0.230 mmol) at  $0\text{ }^\circ\text{C}$  under Ar atmosphere, and the mixture was stirred at room temperature and then  $40\text{ }^\circ\text{C}$  for 16 h. The reaction mixture was quenched with  $\text{H}_2\text{O}$  and extracted with AcOEt (twice). The combined organic layers were washed with brine, dried over  $\text{MgSO}_4$  and concentrated in vacuo. The resulting residue was purified by silica gel column chromatography (Hexane-AcOEt, 3:1) to afford an inseparable mixture of **21** and **21'** (11.8 mg, 70%) as a yellow oil.

IR (neat) 3492, 2916, 1731, 1607, 1593, 1479, 1404, 1257, 1216, 1051, 756,  $666\text{ cm}^{-1}$ ;  $^1\text{H}$  NMR (400 MHz,  $\text{CDCl}_3$ )  $\delta$  1.15 (d,  $J = 6.9\text{ Hz}$ , 3H), 1.21 (d,  $J = 6.9\text{ Hz}$ , 3H), 2.58-2.49 (m, 2H), 2.89-2.80 (m, 2H) 3.49 (d,  $J = 4.6\text{ Hz}$ , 12H), 3.92 (q,  $J = 4.7\text{ Hz}$ , 1H), 4.09 (d,  $J = 10.1\text{ Hz}$ , 1H), 4.20 (t,  $J = 10.1\text{ Hz}$ , 3H), 4.31 (d,  $J = 10.5\text{ Hz}$ , 1H), 4.45 (s, 1H), 4.55 (s, 1H), 4.78 (d,  $J = 6.9\text{ Hz}$ , 1H), 4.87 (s, 2H), 4.94 (d,  $J = 6.9\text{ Hz}$ , 1H), 5.18-5.06 (m, 8H), 5.36 (d,  $J = 22.9\text{ Hz}$ , 2H), 6.10-5.94 (m, 2H), 6.48 (d,  $J = 7.8\text{ Hz}$ , 2H), 6.65 (q,  $J = 4.1\text{ Hz}$ , 2H), 7.11 (q,  $J = 7.3\text{ Hz}$ , 2H);  $^{13}\text{C}$  NMR (100 MHz,  $\text{CDCl}_3$ )  $\delta$  17.7, 18.1, 39.4, 40.1, 55.9(2C), 56.2(2C) 56.3(2C), 70.4, 71.4, 72.6, 74.4, 74.7, 75.1, 78.0, 80.4, 88.0, 89.9, 94.9, 95.7, 107.0(2C), 109.5, 109.6, 113.7(2C), 115.8, 116.1, 130.5, 130.6, 139.3, 139.7, 153.4, 153.6, 154.1, 154.2; HRMS (ESI-TOF) Calcd for  $\text{C}_{19}\text{H}_{26}\text{O}_7\text{Na}$   $[\text{M}+\text{Na}]^+$  389.1571. Found 389.1568.

The relative stereochemistry of **21** (desired, major) and **21'** (undesired, minor) was determined by NOESY experiment of the corresponding acetonides **S5** and **S5'**. (see page 41)

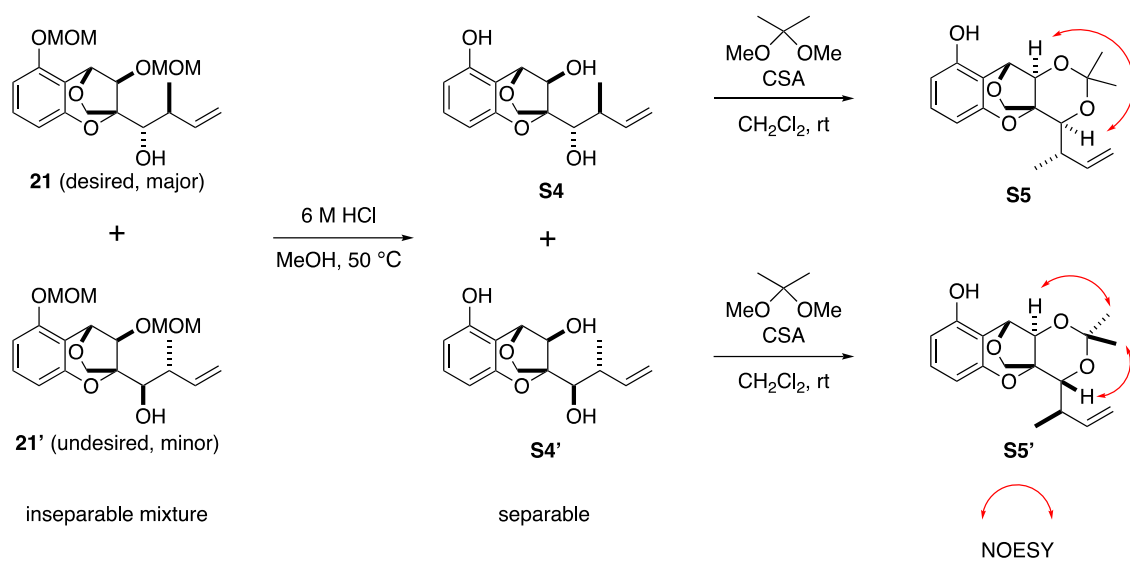

The relative stereochemistry between the secondary alcohol and methyl group in **21** and **21'** was determined by NOESY experiment of phomopsol B (**2**) and its diastereomer **2'**. (see page 43)

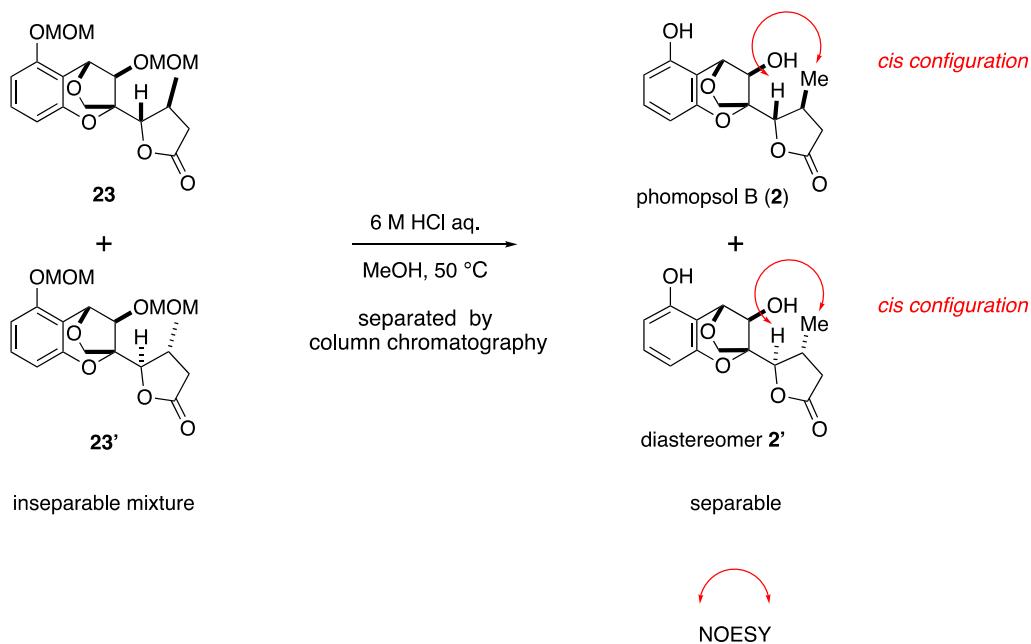

(1*S*,2*S*)-1-((2*S*,5*R*,10*R*)-6,10-bis(methoxymethoxy)-5*H*-2,5-methanobenzo[*e*][1,4]dioxepin-2(3*H*)-yl)-2-methylbutane-1,4-diol (**22**)

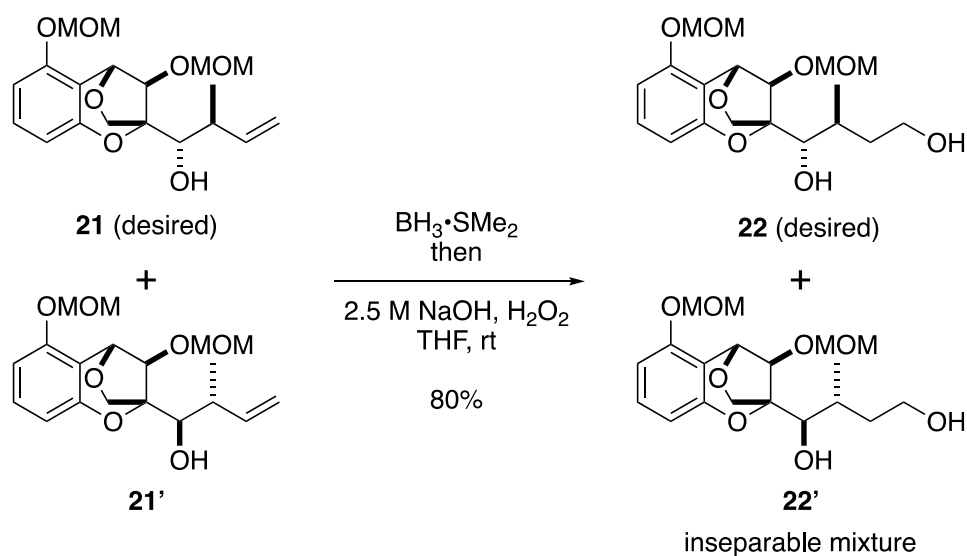

To a stirred solution of an inseparable mixture of **21** and **21'** (16.3 mg, 0.0445 mmol) in  $\text{CH}_2\text{Cl}_2$  (3 mL) was added  $\text{BH}_3 \cdot \text{SMe}_2$  (0.500 mL, 0.380 mmol) at  $0^\circ\text{C}$  under Ar atmosphere, and the mixture was stirred for 1 h at room temperature. To the mixture were added NaOH (2.5 M in  $\text{H}_2\text{O}$ , 3.50 mL) and  $\text{H}_2\text{O}_2$  (30% in  $\text{H}_2\text{O}$ , 7.00 mL) at  $0^\circ\text{C}$ , and the mixture was stirred for 1 h at the same temperature. The reaction mixture was quenched with sat.  $\text{Na}_2\text{S}_2\text{O}_3$  aq. and extracted with  $\text{CHCl}_3$  (twice). The combined organic layers were washed with brine, dried over  $\text{MgSO}_4$  and concentrated in vacuo. The resulting residue was purified by silica gel column chromatography (Hexane-AcOEt, 1:1) to afford an inseparable mixture of **22** and **22'** (13.7 mg, 80%) as a yellow oil.

IR (neat) 3433, 3016, 2933, 1607, 1463, 1407, 1216, 1051, 763, 666  $\text{cm}^{-1}$ ;  $^1\text{H}$  NMR (400 MHz,  $\text{CDCl}_3$ )  $\delta$  1.05 (d,  $J = 6.9$  Hz, 3H), 1.14 (d,  $J = 7.3$  Hz, 3H), 1.84-1.70 (m, 2H), 2.02-1.97 (m, 2H), 2.41-2.24 (m, 6H), 3.48 (t,  $J = 3.9$  Hz, 12H), 3.85-3.64 (m, 4H), 3.91 (d,  $J = 5.0$  Hz, 1H), 4.04 (d,  $J = 10.5$  Hz, 1H), 4.13 (d,  $J = 4.1$  Hz, 1H), 4.24 (dd,  $J = 25.6, 10.5$  Hz, 2H), 4.43-4.39 (m, 2H), 4.56 (s, 1H), 4.78 (d,  $J = 6.9$  Hz, 1H), 4.88 (d,  $J = 1.8$  Hz, 2H), 4.93 (d,  $J = 6.9$  Hz, 1H), 5.18 (d,  $J = 3.2$  Hz, 4H), 5.31 (s, 1H), 5.42 (s, 1H), 6.47 (q,  $J = 3.8$  Hz, 2H), 6.66 (t,  $J = 7.5$  Hz, 2H), 7.10 (td,  $J = 8.2, 5.0$  Hz, 2H);  $^{13}\text{C}$  NMR (100 MHz,  $\text{CDCl}_3$ )  $\delta$  13.8, 17.3, 17.5, 22.3, 31.3, 32.1, 32.8, 33.7, 35.2, 55.6, 55.9, 60.2, 70.4, 70.9, 73.0, 74.1, 74.9, 75.4, 78.1, 79.6, 88.6(2C), 90.8, 94.6, 95.6, 106.8(2C), 109.1, 109.2, 113.2, 130.2, 130.3, 152.9, 153.2, 153.8, 153.9; HRMS (ESI-TOF) Calcd for  $\text{C}_{19}\text{H}_{28}\text{O}_8\text{Na}$   $[\text{M}+\text{Na}]^+$  407.1676. Found 407.1674.

(4*S*,5*S*)-5-((2*S*,5*R*,10*R*)-6,10-bis(methoxymethoxy)-5*H*-2,5-methanobenzo[*e*][1,4]dioxepin-2(3*H*)-yl)-4-methyldihydrofuran-2(3*H*)-one (**23**)

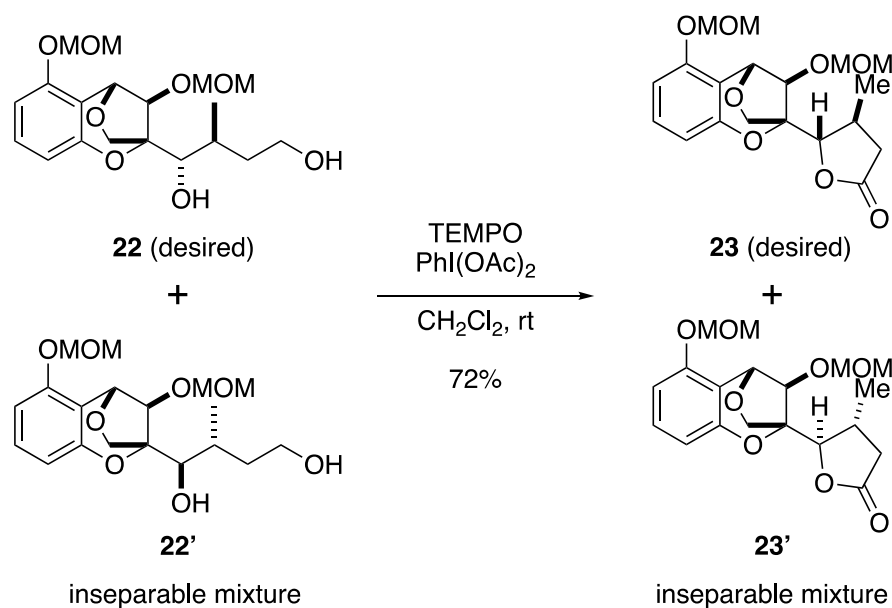

To a stirred solution of an inseparable mixture of **22** and **22'** (4.80 mg, 0.0124 mmol) in  $\text{CH}_2\text{Cl}_2$  (0.5 mL) were added TEMPO (0.400 mg, 0.00256 mmol) and  $\text{PhI(OAc)}_2$  (10.0 mg, 0.0299 mmol) at room temperature under Ar atmosphere, and the mixture was stirred for 13 h at the same temperature. The reaction mixture was quenched with sat.  $\text{NaHCO}_3$  aq. and extracted with AcOEt (twice). The combined organic layers were washed with brine, dried over  $\text{MgSO}_4$  and concentrated in vacuo. The resulting residue was purified by silica gel column chromatography (Hexane-AcOEt, 1:1) to afford an inseparable mixture of **23** and **23'** (3.40 mg, 72%) as a yellow oil.

IR (neat) 2955, 1781, 1593, 1462, 1258, 1219, 1154, 1115, 1052, 774  $\text{cm}^{-1}$ ;  $^1\text{H}$  NMR (400 MHz,  $\text{CDCl}_3$ )  $\delta$  1.22 (d,  $J = 6.9$  Hz, 3H), 1.26 (d,  $J = 7.3$  Hz, 3H), 2.23-2.15 (m, 2H), 2.68 (dd,  $J = 6.6, 4.3$  Hz, 1H), 3.05-2.98 (m, 2H), 2.68 (dd,  $J = 6.6, 4.3$  Hz, 1H), 3.48 (d,  $J = 9.6$  Hz, 12H), 4.05 (d,  $J = 10.1$  Hz, 1H), 4.16 (d,  $J = 10.1$  Hz, 1H), 4.25-4.34 (2H), 4.37-4.46 (1H), 4.54 (s, 1H), 4.64 (d,  $J = 3.7$  Hz, 1H), 4.77-4.73 (m, 2H), 4.87 (q,  $J = 7.3$  Hz, 2H), 4.93 (d,  $J = 6.9$  Hz, 1H), 5.18 (s, 4H), 5.40 (s, 1H), 5.50 (s, 1H), 6.43 (t,  $J = 8.9$  Hz, 2H), 6.67 (q,  $J = 4.1$  Hz, 2H), 7.11 (dd,  $J = 14.0, 8.0$  Hz, 2H);  $^{13}\text{C}$  NMR (100 MHz,  $\text{CDCl}_3$ )  $\delta$  20.2, 20.4, 30.3, 31.0, 36.8, 37.1, 56.1, 56.3, 56.4, 71.1, 71.8, 73.8(2C), 76.0(2C), 83.5(2C), 86.0(2C), 87.7, 88.0, 94.95, 94.99, 95.4, 107.36, 107.39, 109.7(2C), 113.3, 113.4, 130.8, 130.9, 153.1, 153.2, 154.2, 154.3, 176.7, 177.0; HRMS (ESI-TOF) Calcd for  $\text{C}_{19}\text{H}_{24}\text{O}_8\text{Na}$   $[\text{M}+\text{Na}]^+$  403.1363. Found 403.1361.

(4*S*,5*S*)-5-((2*R*,5*R*,10*R*)-6,10-dihydroxy-5*H*-2,5-methanobenzo[*e*][1,4]dioxepin-2(3*H*)-yl)-4-

methylidihydrofuran-2(3*H*)-one (**2**: phomopsol B)

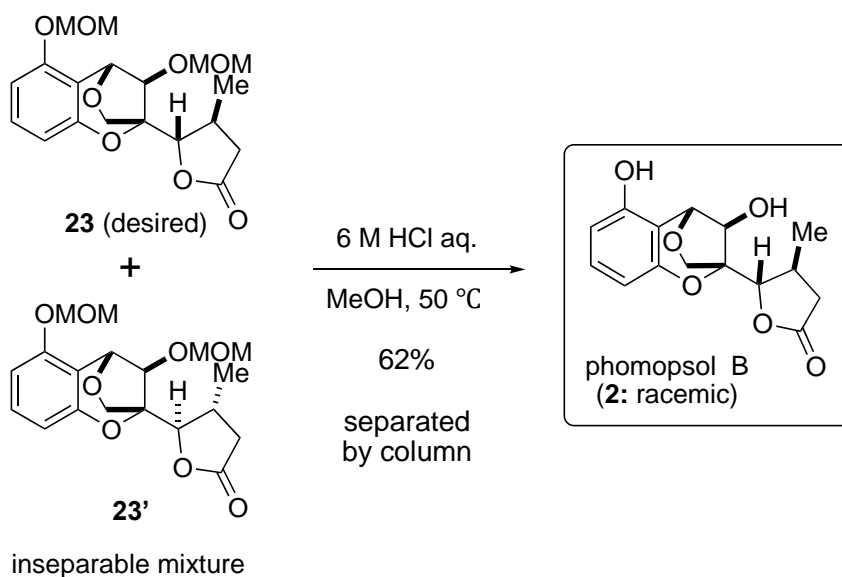

To a stirred solution of an inseparable mixture of **23** and **23'** (4.00 mg, 0.0105 mmol) in MeOH (1 mL) was added 6 M HCl (0.05 mL) at room temperature under Ar atmosphere, and the mixture was stirred for 24 h at 50 °C. The reaction mixture was quenched with sat. NaHCO<sub>3</sub> aq. and extracted with AcOEt (twice). The combined organic layers were washed with brine, dried over MgSO<sub>4</sub> and concentrated in vacuo. The resulting residue was purified by silica gel column chromatography (Hexane-AcOEt, 2:3) to afford **2** (1.9 mg, 62%) as a colorless oil.

IR (neat) 3374, 2927, 1769, 1600, 1467, 1297, 1216, 1182, 1095, 1034, 897, 667 cm<sup>-1</sup>; <sup>1</sup>H NMR (400 MHz, CD<sub>3</sub>OD) δ 1.28 (d, J = 6.4 Hz, 3H), 2.28-2.16 (m, 1H), 2.98-2.92 (m, 2H), 4.15 (d, J = 10.5 Hz, 1H), 4.27 (d, J = 10.5 Hz, 1H), 4.42 (s, 1H), 4.76 (d, J = 3.7 Hz, 1H), 5.17 (s, 1H), 6.27 (d, J = 8.2 Hz, 1H), 6.35 (d, J = 7.8 Hz, 1H), 6.98 (t, J = 8.2 Hz, 1H); <sup>13</sup>C NMR (100 MHz, CD<sub>3</sub>OD) δ 19.9, 32.0, 37.6, 73.7, 75.9, 76.4, 88.3, 89.2, 107.7, 109.0, 112.8, 131.4, 154.8, 155.7, 179.4; HRMS (ESI-TOF) Calcd for C<sub>15</sub>H<sub>16</sub>O<sub>6</sub>Na [M+Na]<sup>+</sup> 315.0839. Found 315.0824.



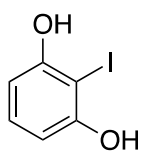

S1

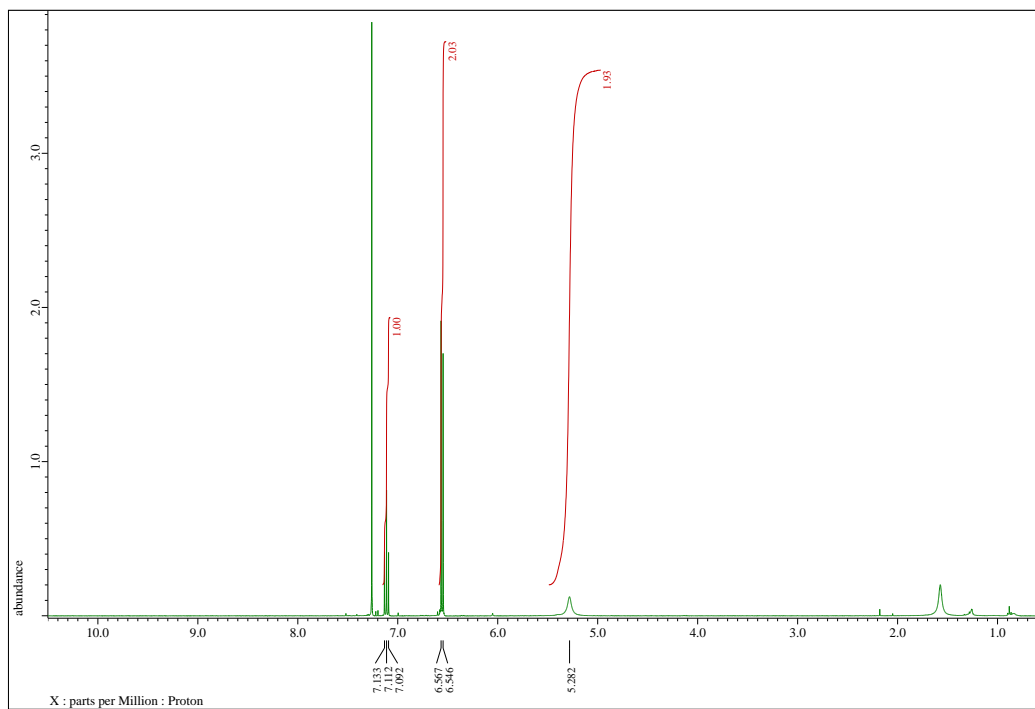

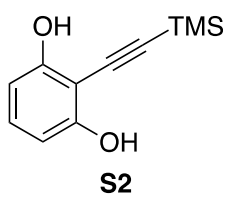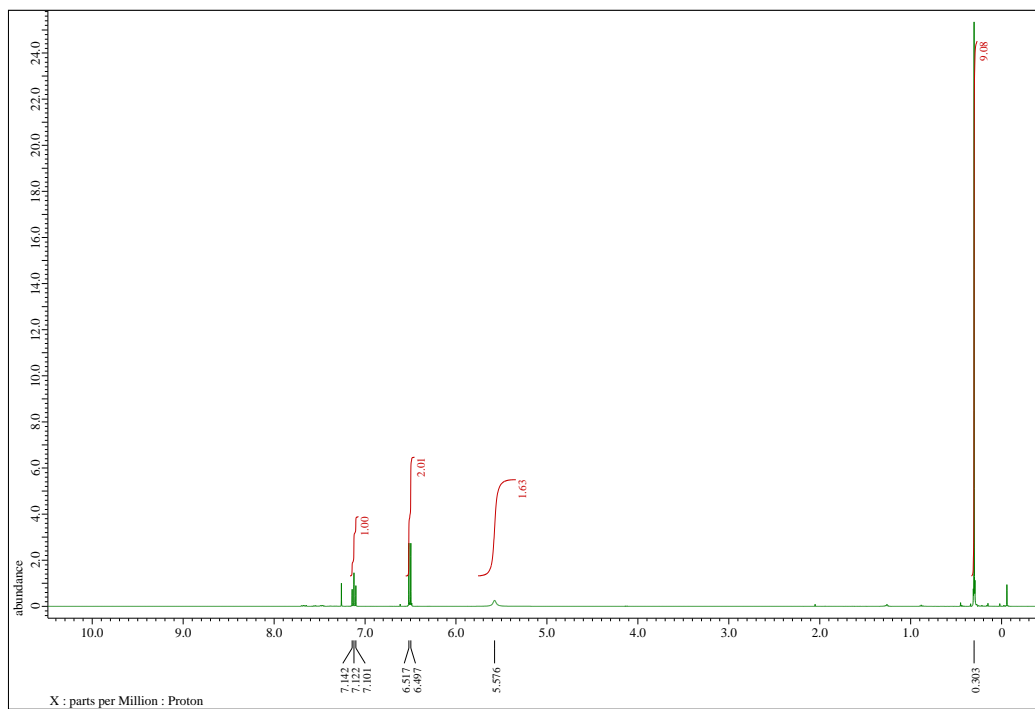

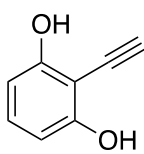

8

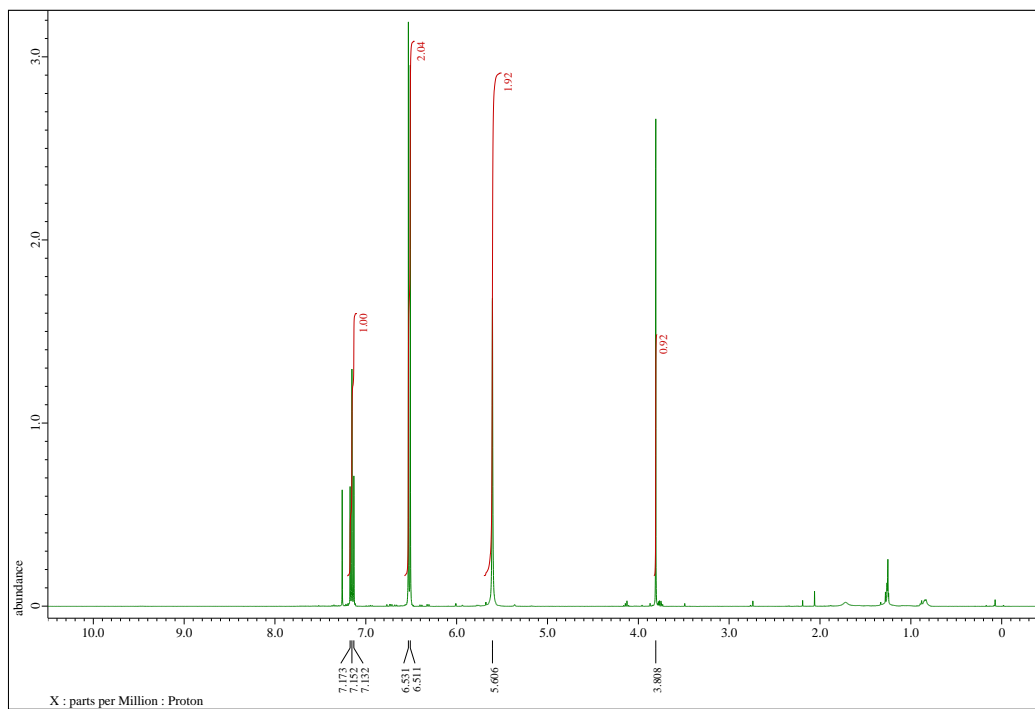

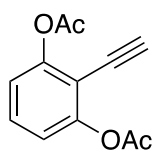

9

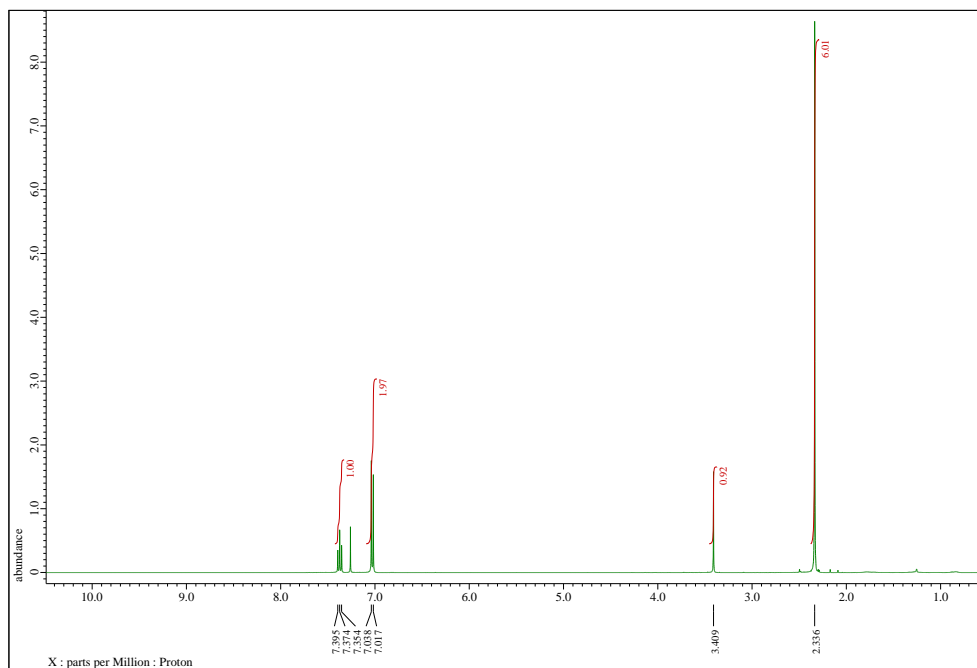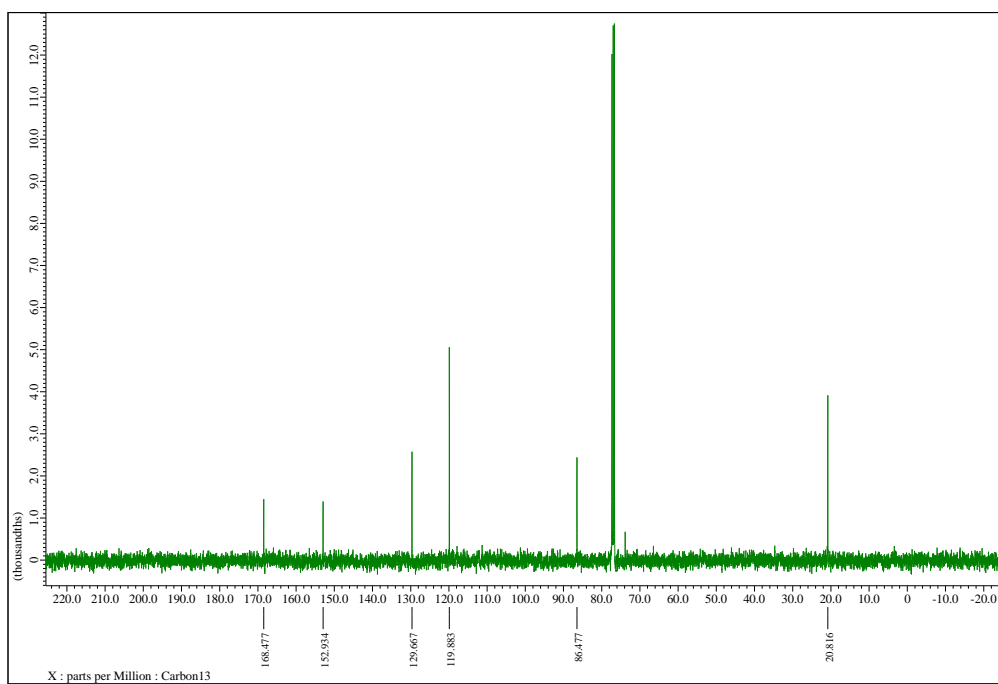

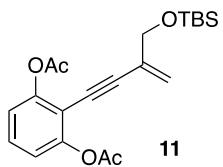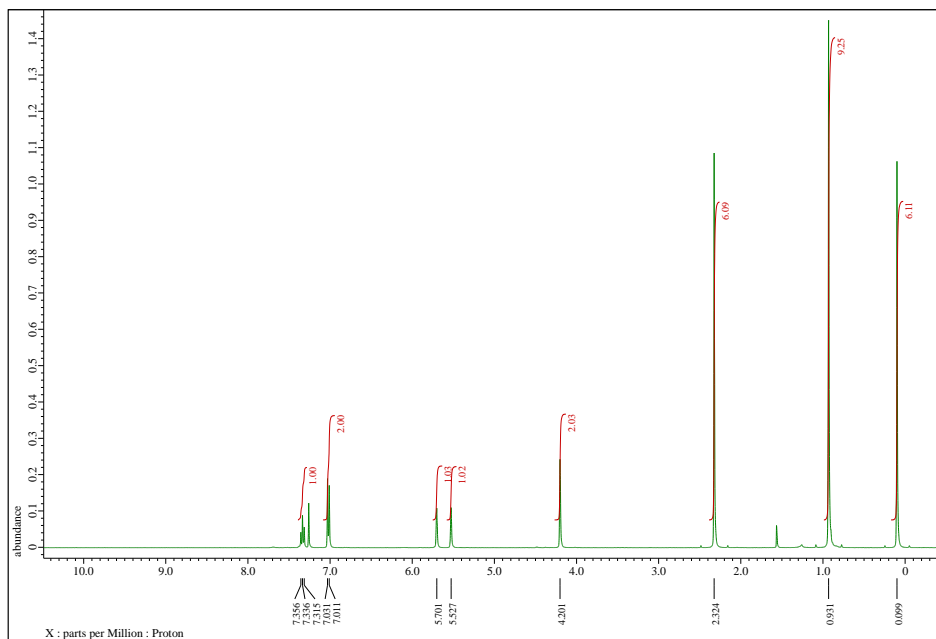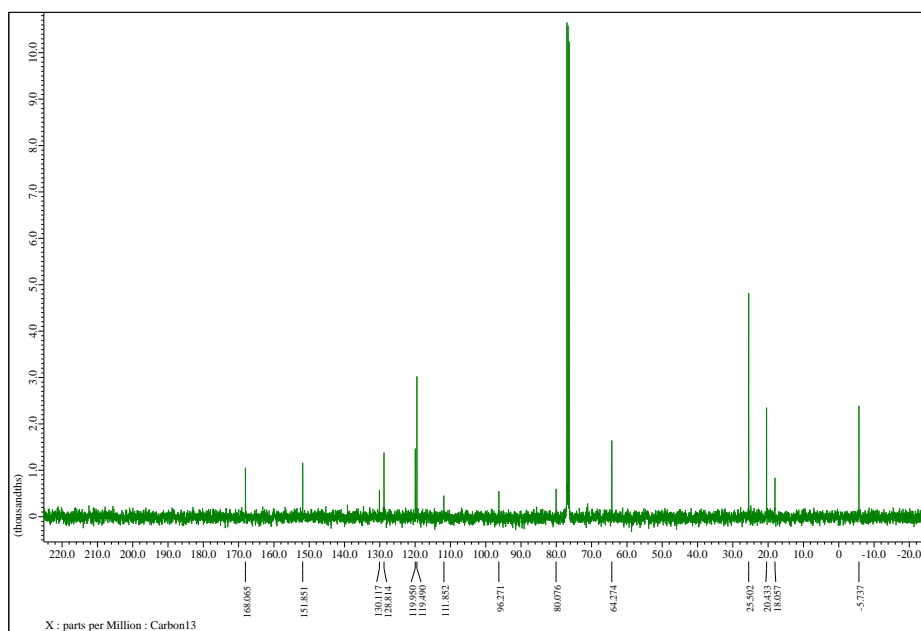

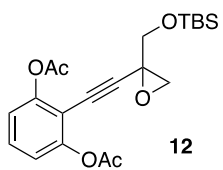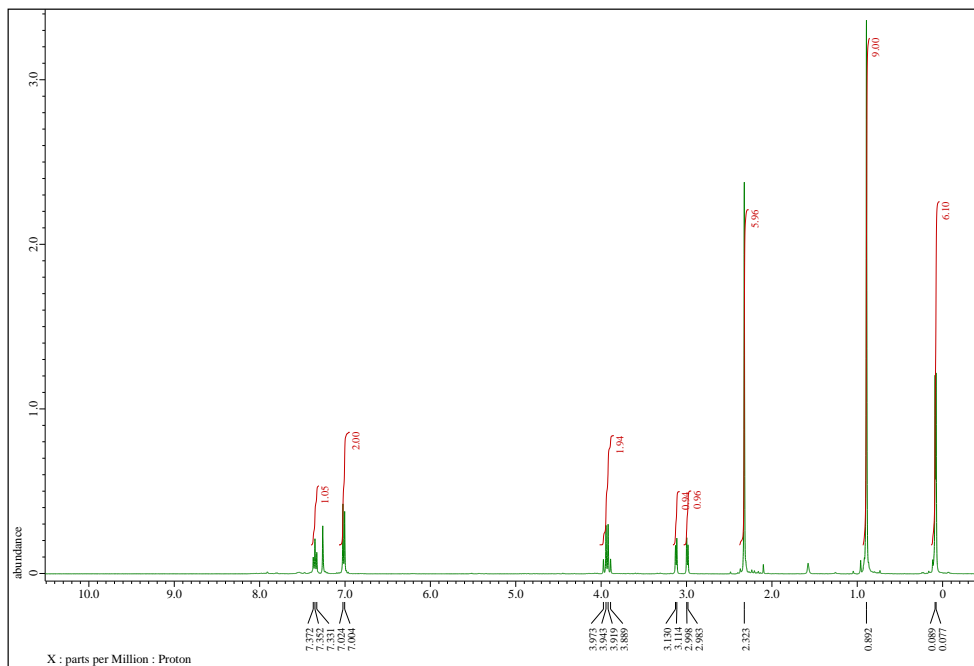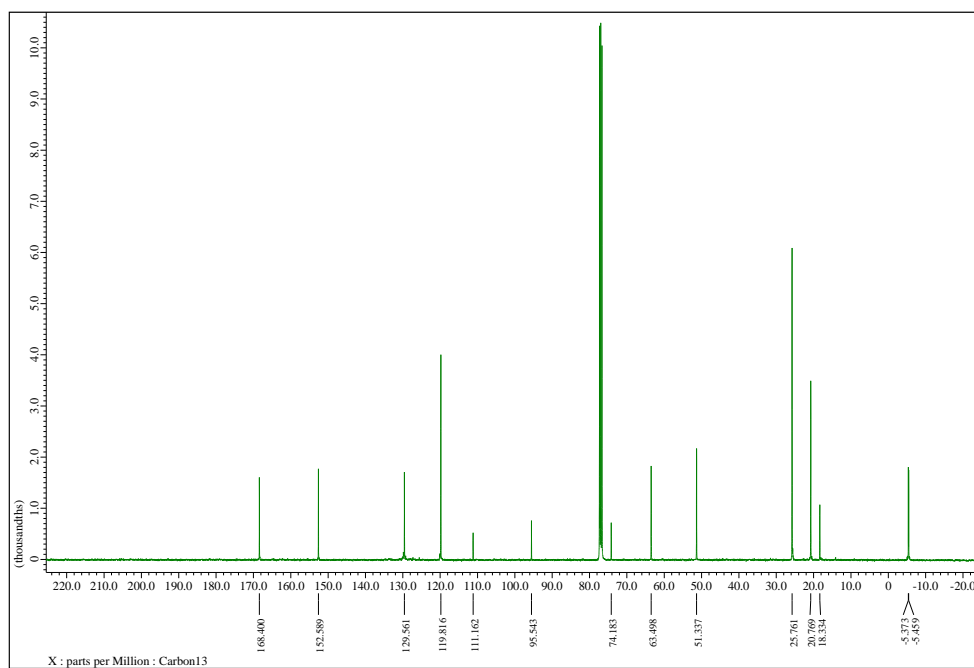

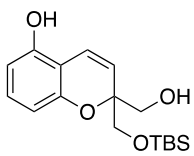

14

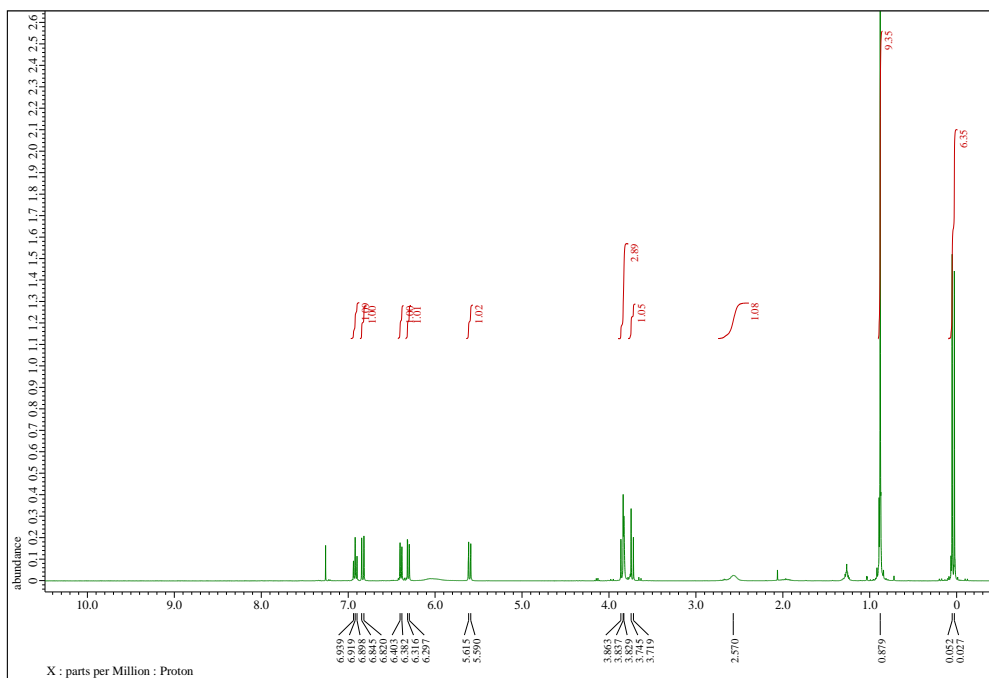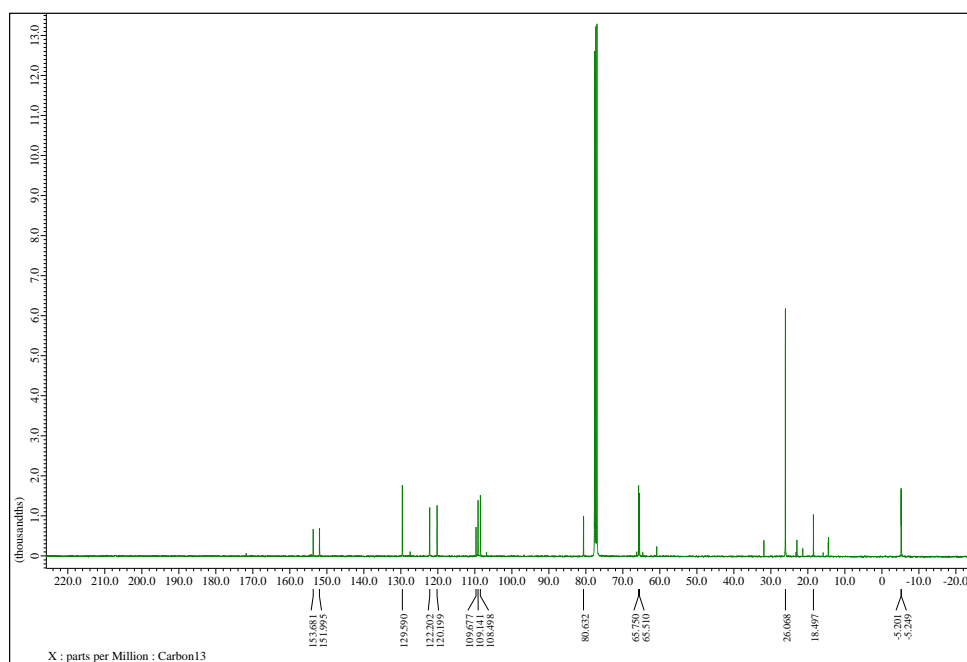

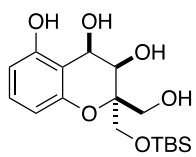

15 (desired)

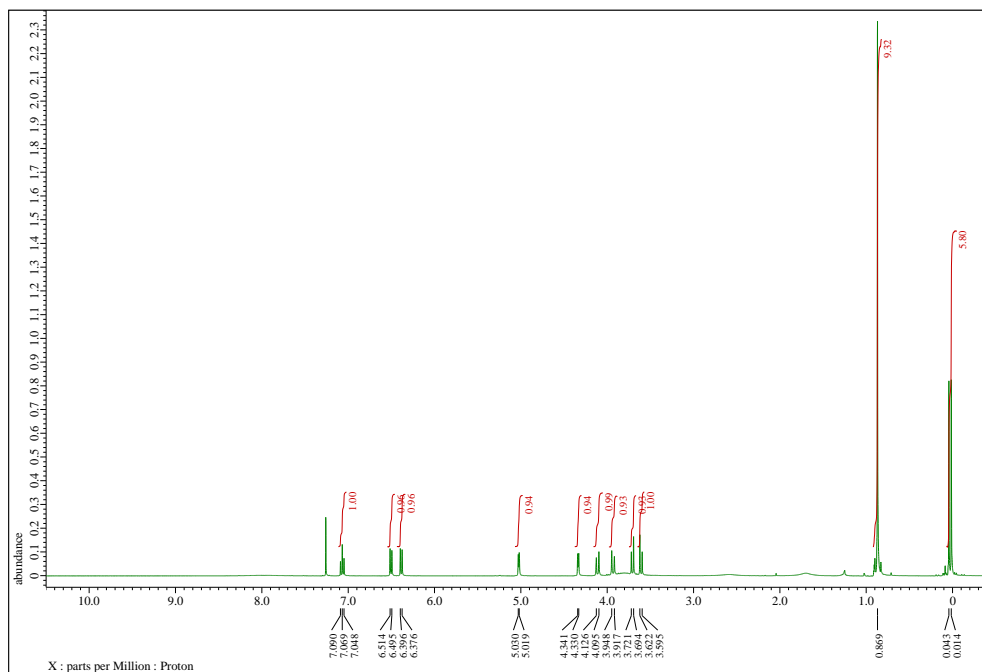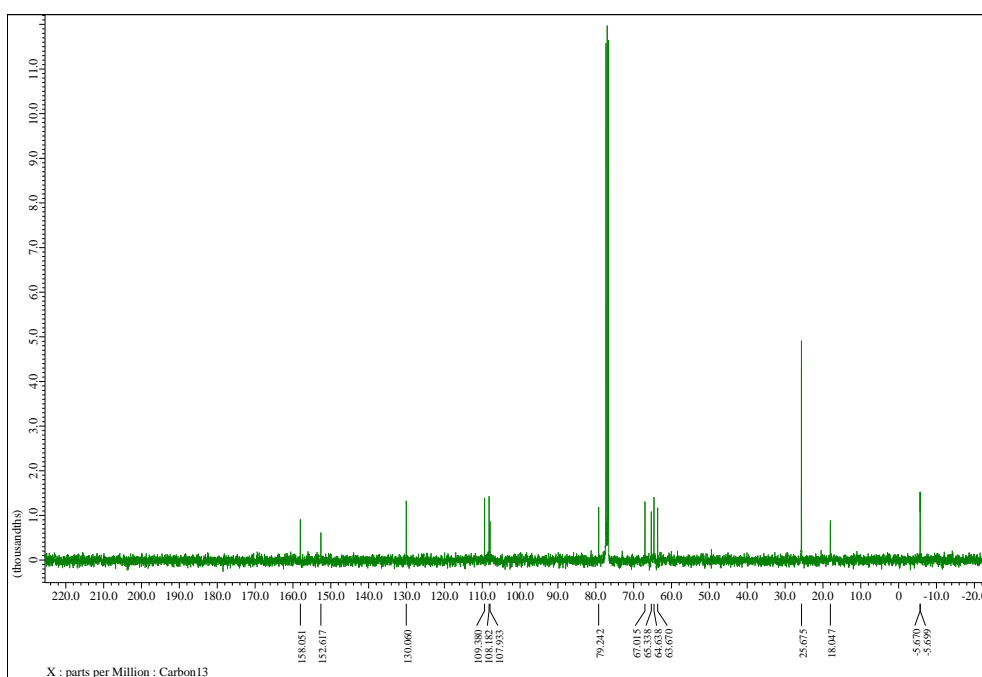



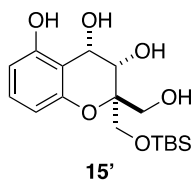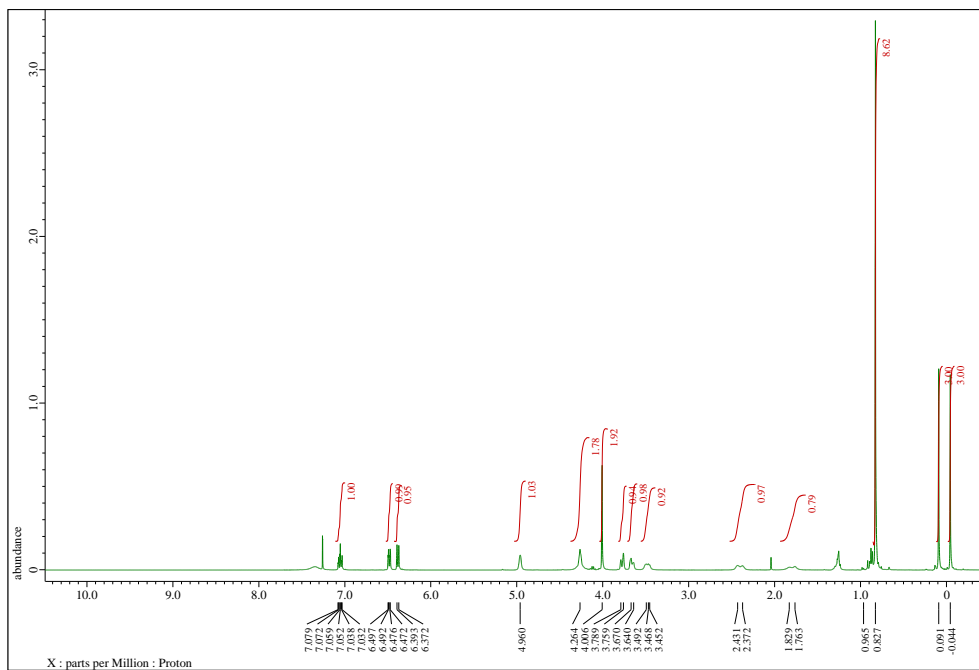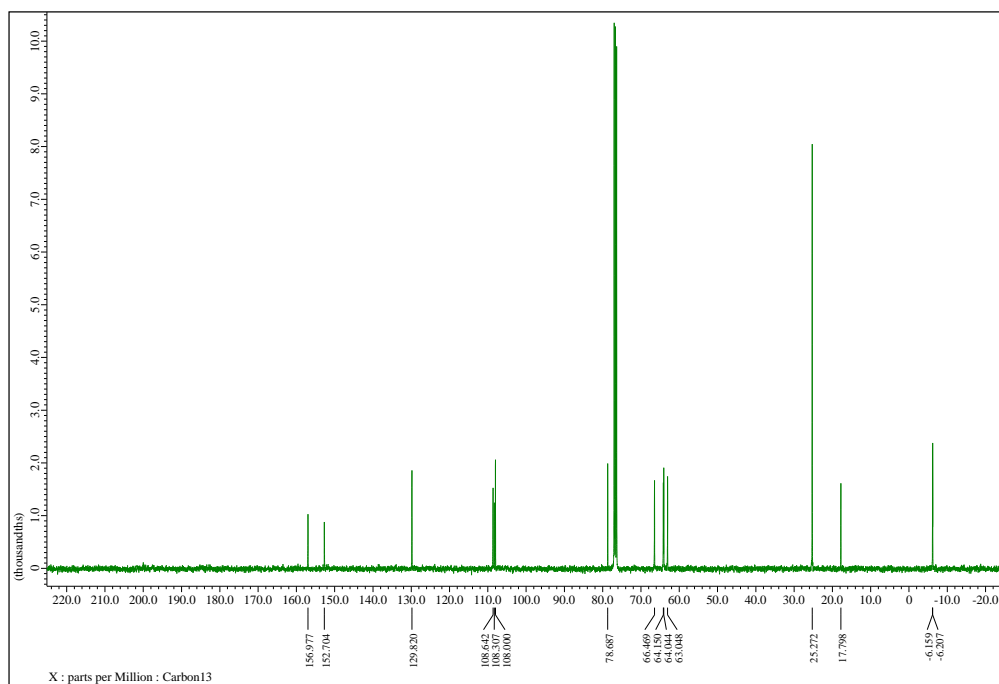

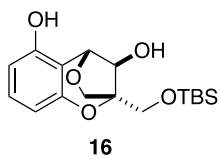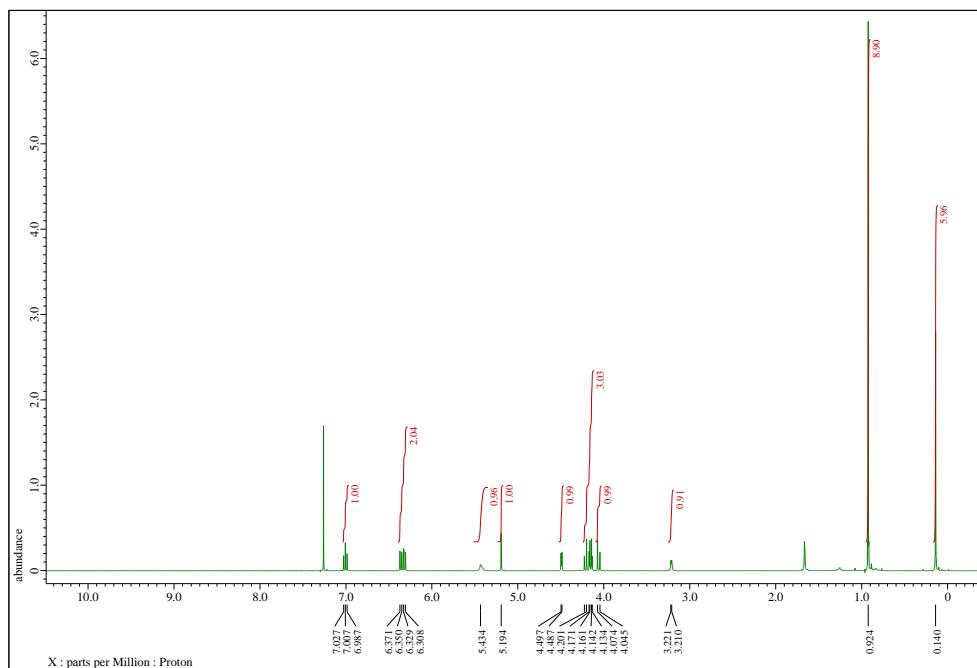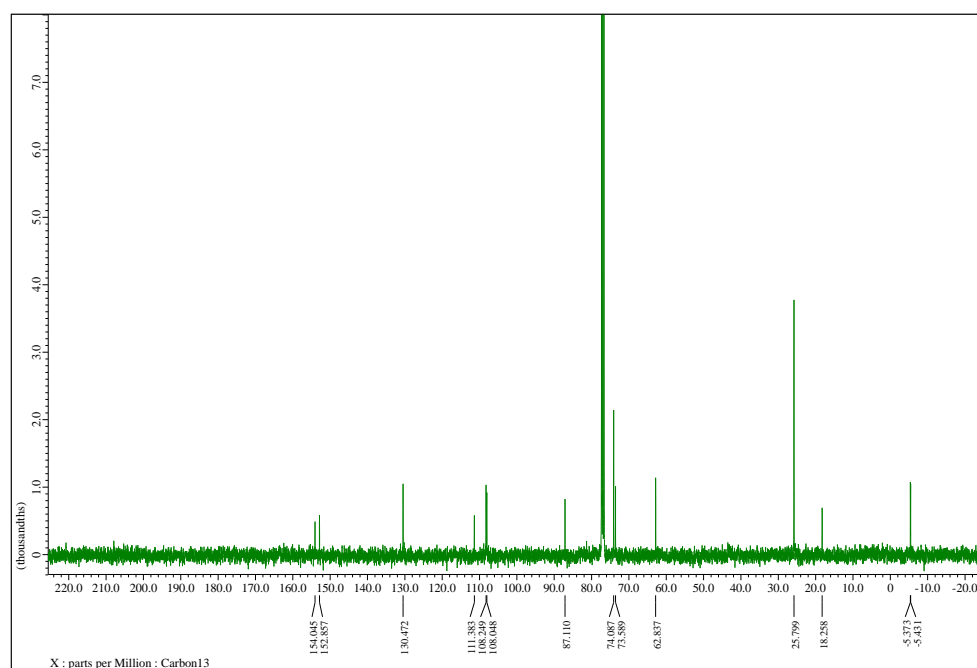

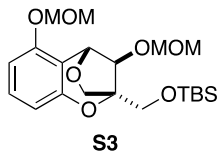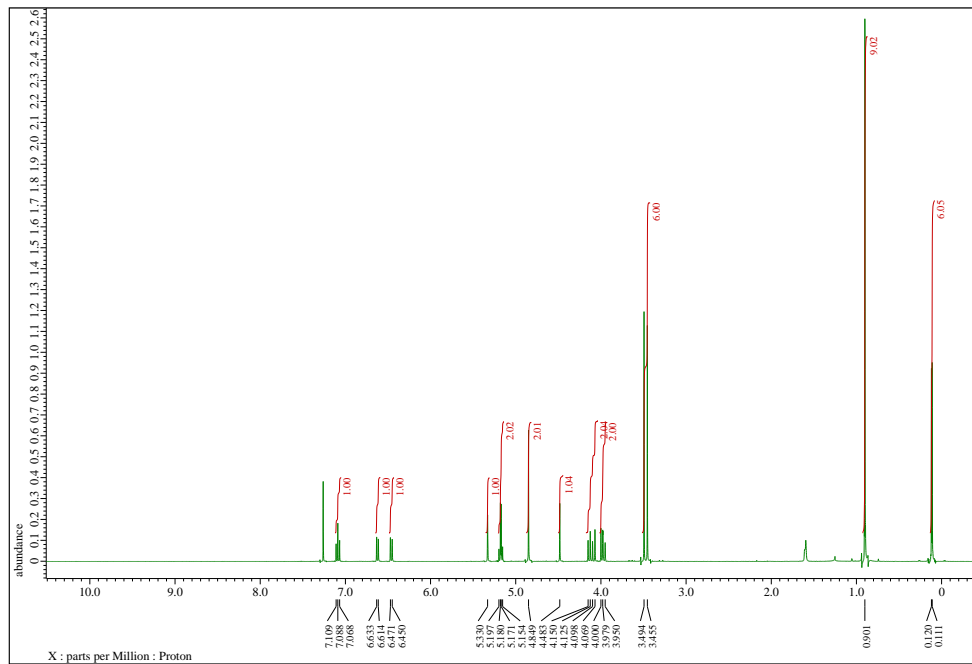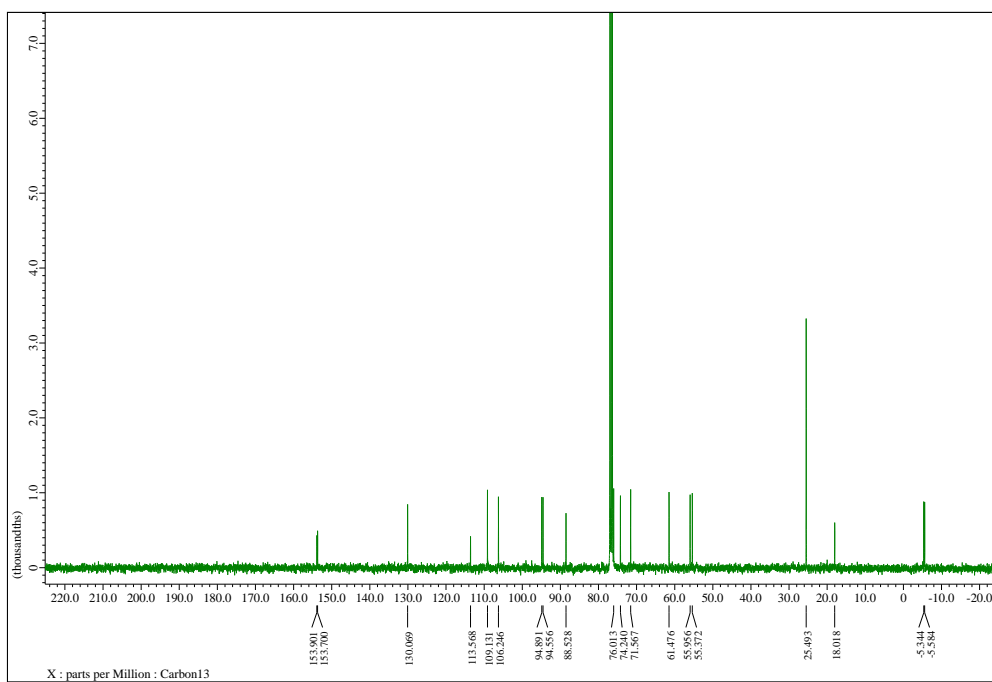

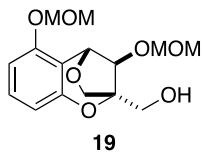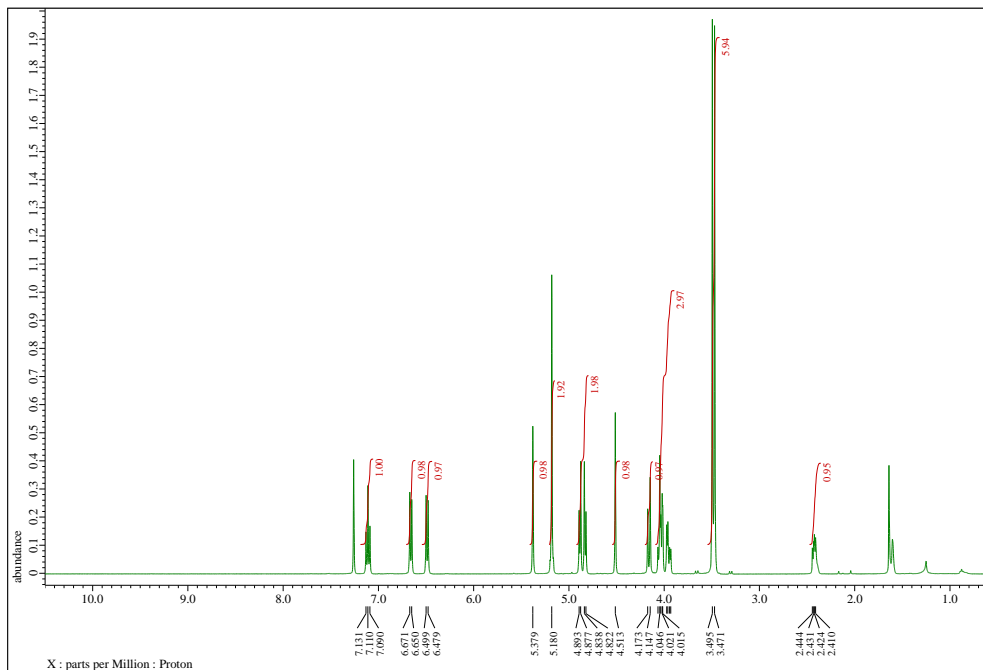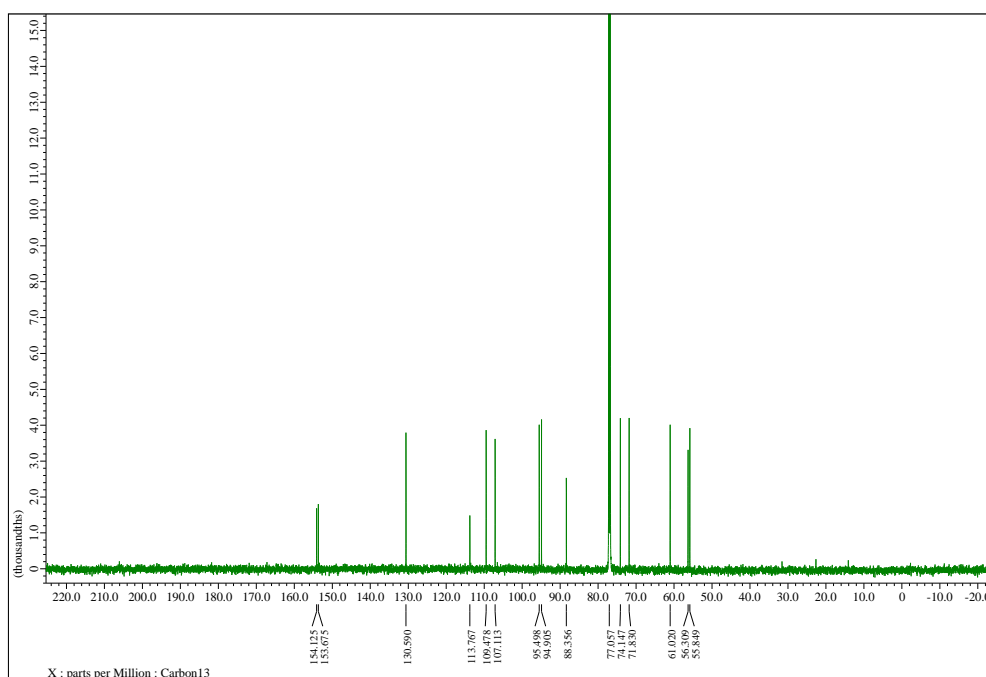

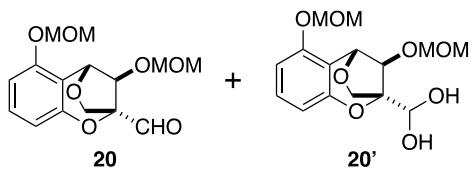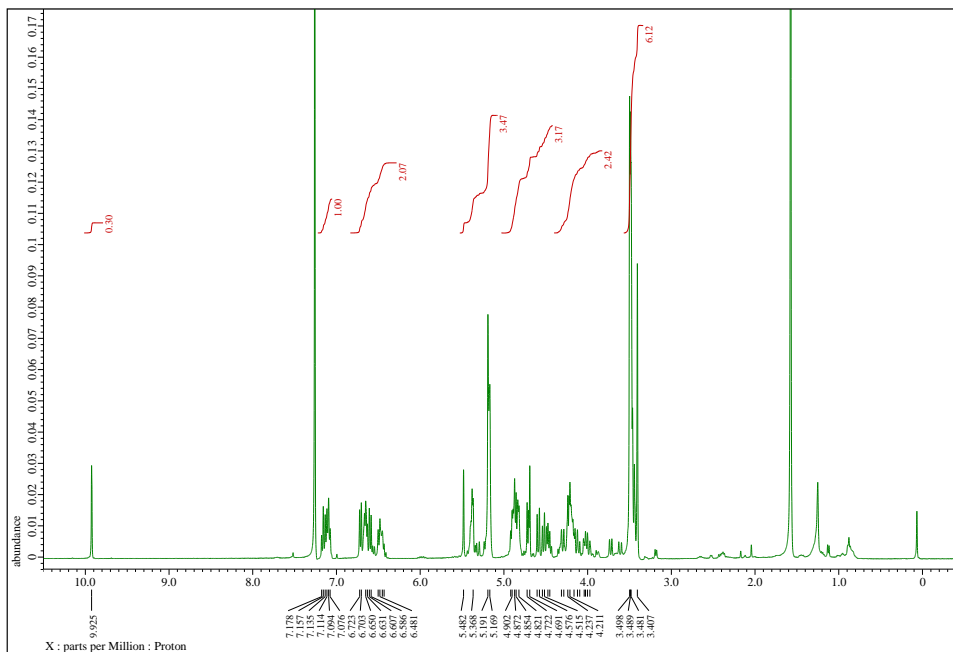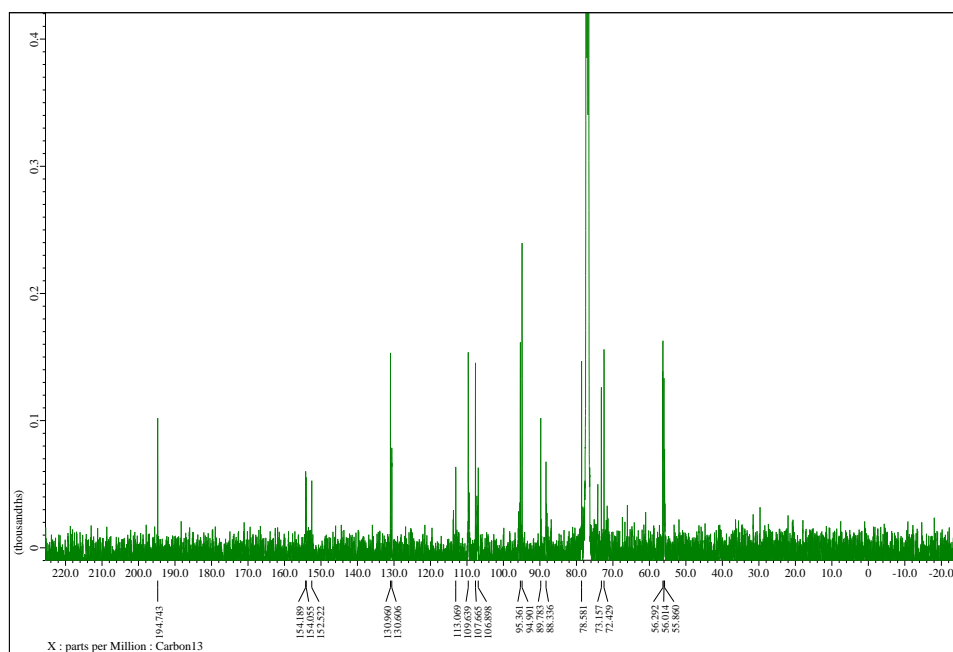

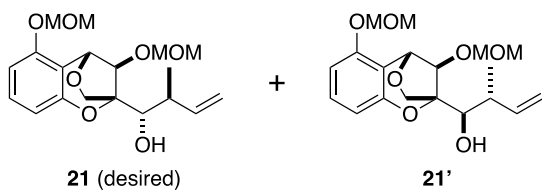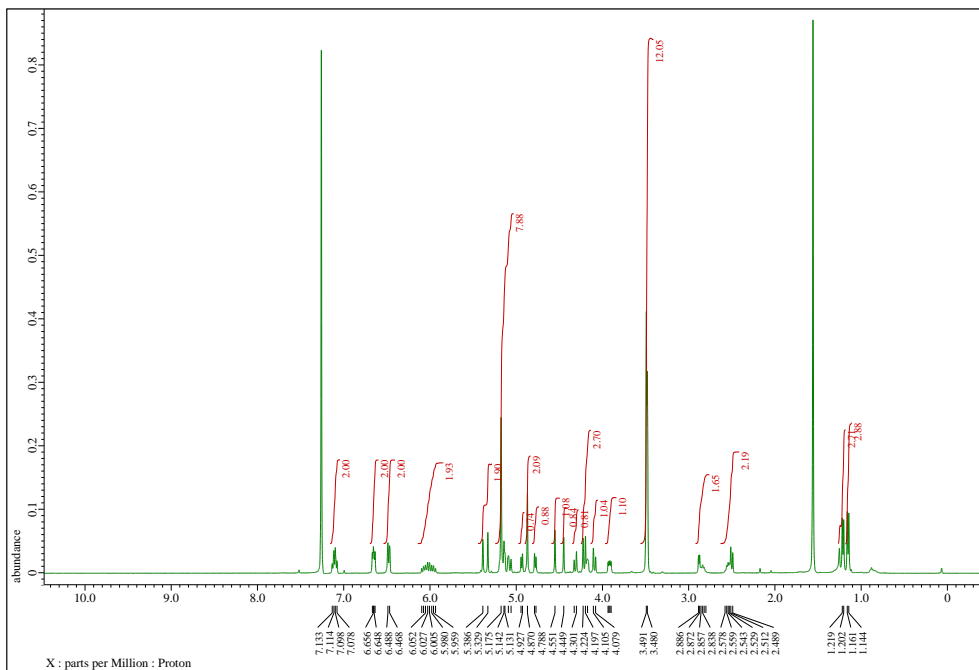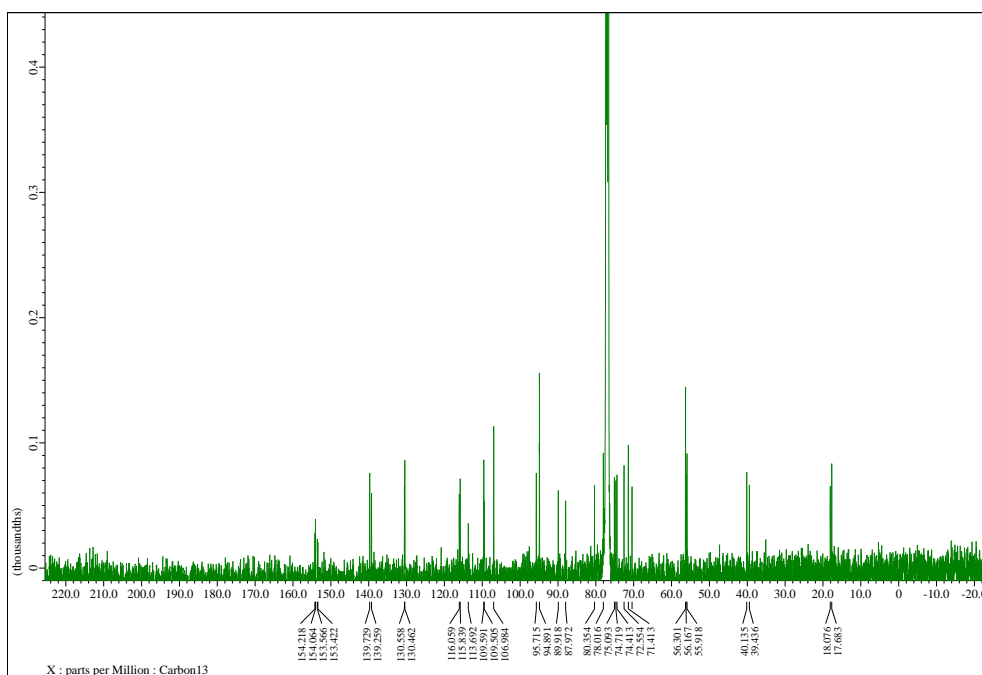

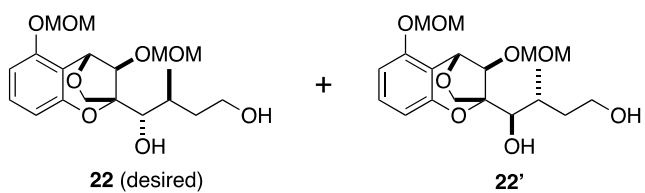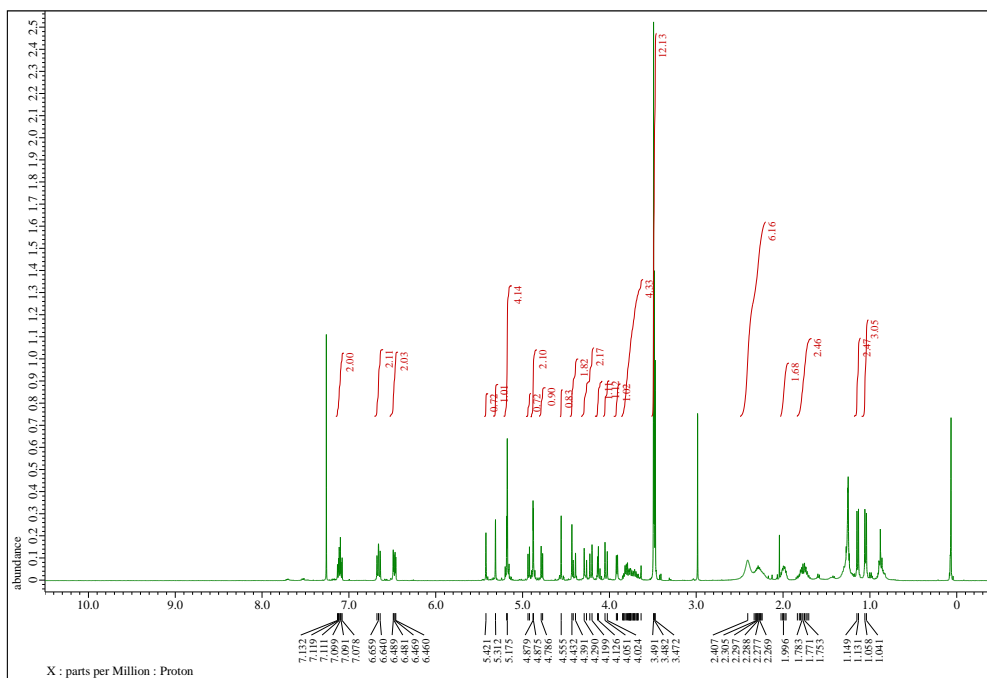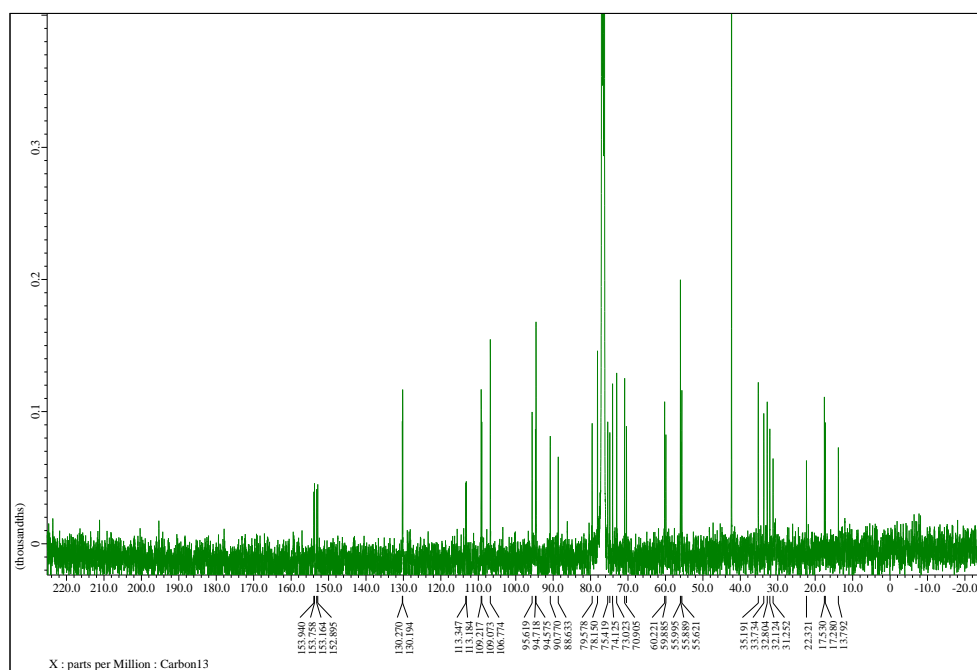

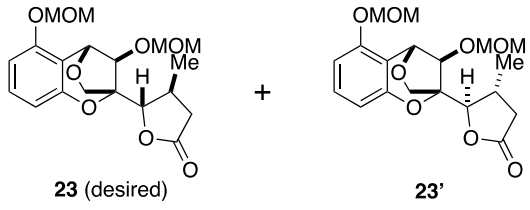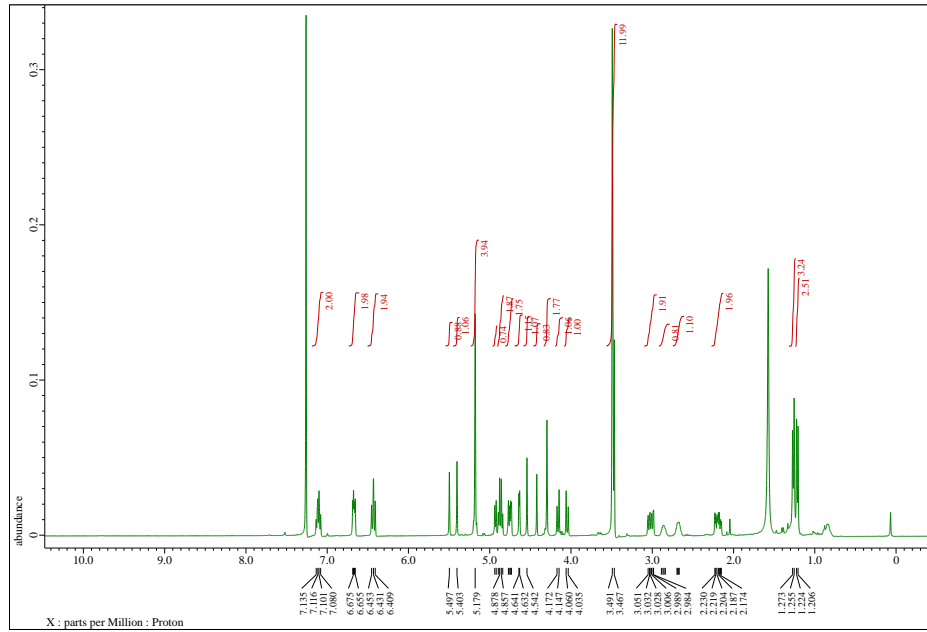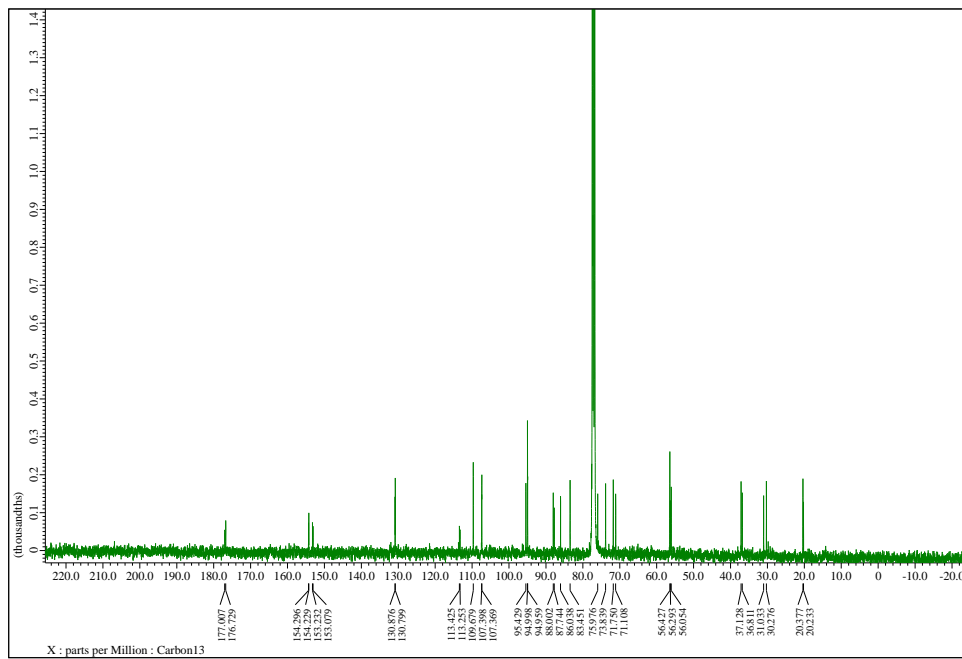



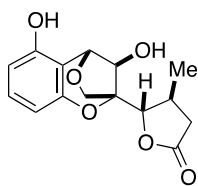

phomopsol B  
(2: racemic)

upper: synthetic, bottom: literature for  $^1\text{H}$  NMR

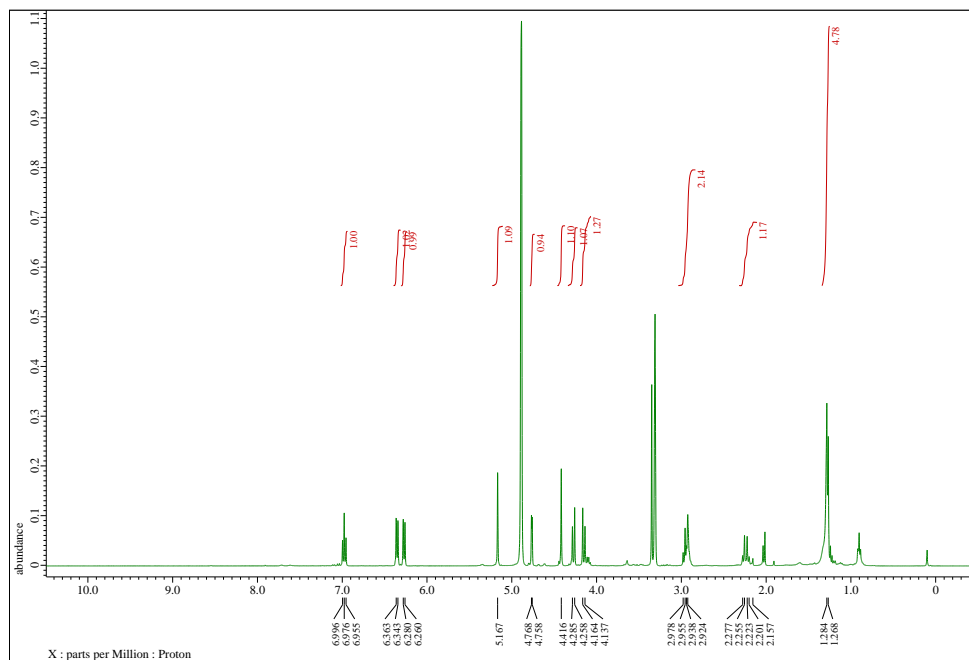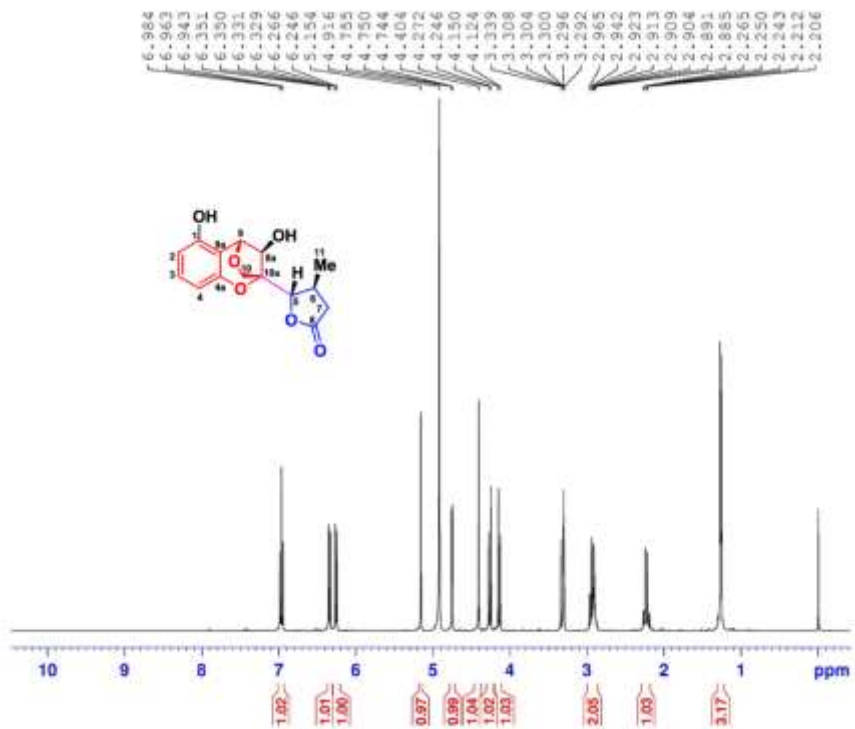

upper: synthetic, bottom: literature for  $^{13}\text{C}$  NMR

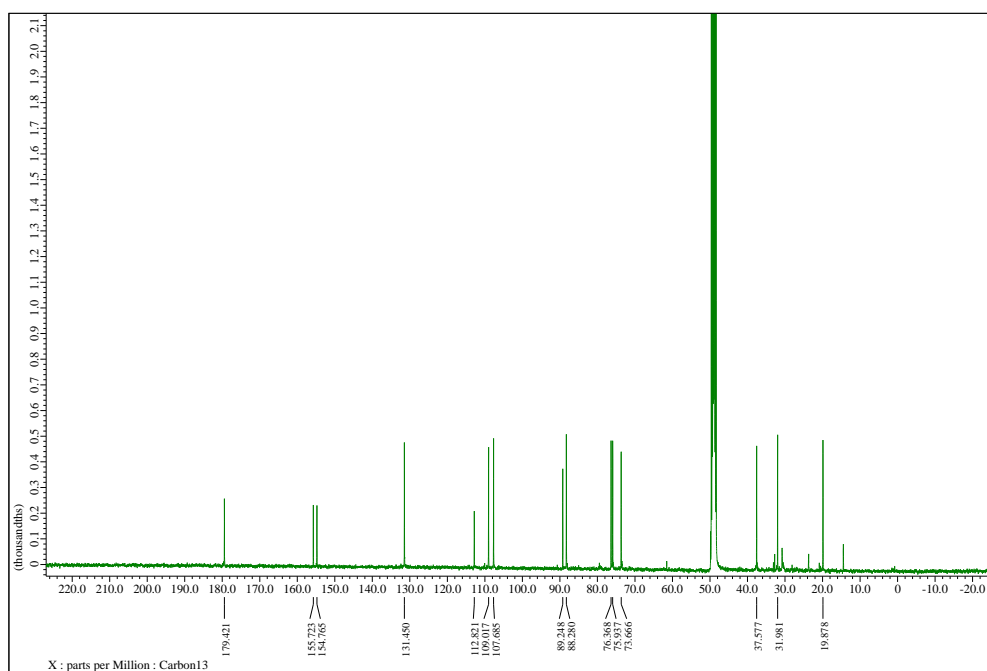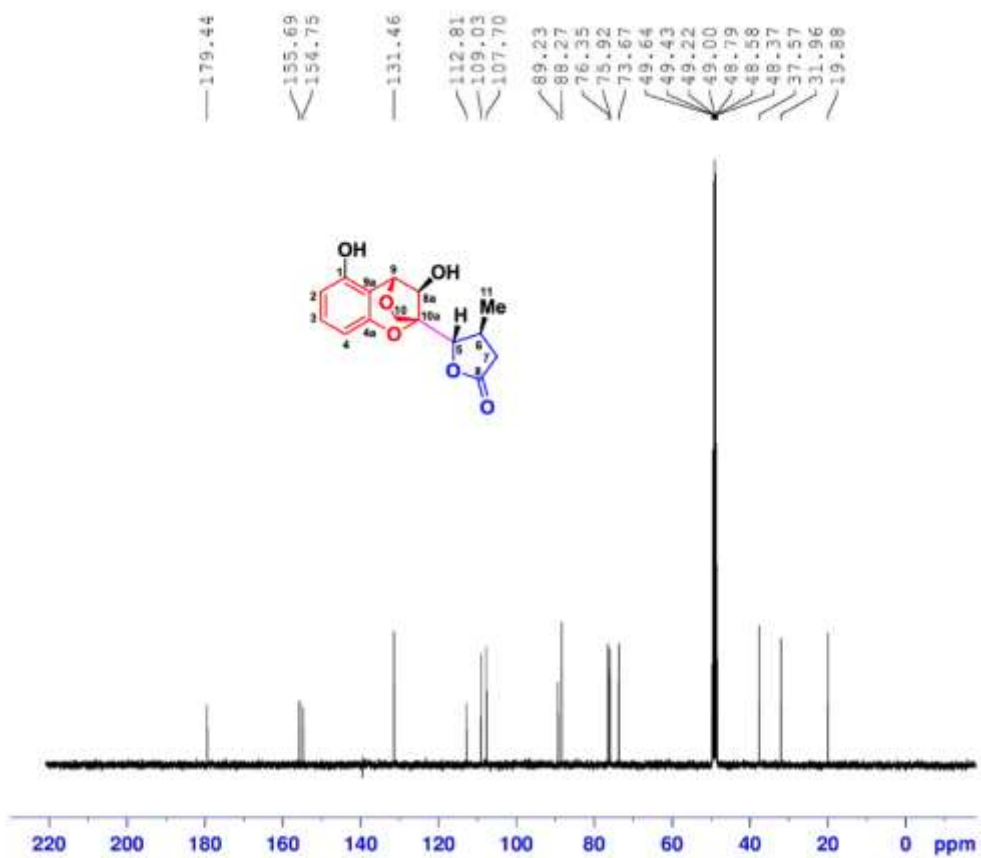

X-ray crystallographic analysis of compound **16** (CCDC2298603)

## NA-1-66-2

Single crystals of  $C_{17}H_{26}O_5Si$  [NA-1-66-2] were grown from vapour diffusion of pentane in chloroform solvent at room temperature. A suitable crystal was selected and was mounted on a MiTeGEN MicroMounts in perfluoropolyether oil on a Bruker APEX-II CCD diffractometer. The crystal was kept at 90 K during data collection. Using Olex2 [1], the structure was solved with the XT [2] structure solution program using Intrinsic Phasing and refined with the XL [3] refinement package using Least Squares minimisation.

**Table 1**

## Experimental details

|                                                                            |                                                                                                                                                                                                                                                    |
|----------------------------------------------------------------------------|----------------------------------------------------------------------------------------------------------------------------------------------------------------------------------------------------------------------------------------------------|
| Crystal data                                                               |                                                                                                                                                                                                                                                    |
| Chemical formula                                                           | $C_{17}H_{26}O_5Si$                                                                                                                                                                                                                                |
| $M_r$                                                                      | 338.47                                                                                                                                                                                                                                             |
| Crystal system, space group                                                | Triclinic, $P\bar{1}$                                                                                                                                                                                                                              |
| Temperature (K)                                                            | 90                                                                                                                                                                                                                                                 |
| $a, b, c$ (Å)                                                              | 7.9252 (8), 9.8381 (9), 12.6943 (12)                                                                                                                                                                                                               |
| $\alpha, \beta, \gamma$ (°)                                                | 98.475 (1), 107.944 (1), 106.441 (1)                                                                                                                                                                                                               |
| $V$ (Å <sup>3</sup> )                                                      | 872.76 (14)                                                                                                                                                                                                                                        |
| $Z$                                                                        | 2                                                                                                                                                                                                                                                  |
| Radiation type                                                             | Mo $K\alpha$                                                                                                                                                                                                                                       |
| $\mu$ (mm <sup>-1</sup> )                                                  | 0.16                                                                                                                                                                                                                                               |
| Crystal size (mm)                                                          | 0.29 × 0.24 × 0.22                                                                                                                                                                                                                                 |
| Data collection                                                            |                                                                                                                                                                                                                                                    |
| Diffractometer                                                             | Bruker SMART APEX II CCD area detector                                                                                                                                                                                                             |
| Absorption correction                                                      | Numerical<br>SADABS2016/2 (Bruker,2016/2) was used for absorption correction. $wR_2(int)$ was 0.0712 before and 0.0345 after correction. The Ratio of minimum to maximum transmission is 0.9425. The $\lambda/2$ correction factor is Not present. |
| $T_{min}, T_{max}$                                                         | 0.937, 0.995                                                                                                                                                                                                                                       |
| No. of measured, independent and observed [ $I > 2\sigma(I)$ ] reflections | 10735, 4301, 3963                                                                                                                                                                                                                                  |
| $R_{int}$                                                                  | 0.024                                                                                                                                                                                                                                              |
| $(\sin \theta/\lambda)_{max}$ (Å <sup>-1</sup> )                           | 0.686                                                                                                                                                                                                                                              |
| Refinement                                                                 |                                                                                                                                                                                                                                                    |
| $R[F^2 > 2\sigma(F^2)], wR(F^2), S$                                        | 0.037, 0.100, 1.04                                                                                                                                                                                                                                 |
| No. of reflections                                                         | 4301                                                                                                                                                                                                                                               |
| No. of parameters                                                          | 215                                                                                                                                                                                                                                                |
| No. of restraints                                                          | 191                                                                                                                                                                                                                                                |
| H-atom treatment                                                           | H-atom parameters constrained                                                                                                                                                                                                                      |
| $\rho_{max}, \rho_{min}$ (e Å <sup>-3</sup> )                              | 0.84, -0.22                                                                                                                                                                                                                                        |

## Crystal structure determination of [NA-1-66-2]

Crystal Data for  $C_{17}H_{26}O_5Si$  ( $M = 338.47$  g/mol): triclinic, space group  $P\bar{1}$  (no. 2),  $a = 7.9252(8)$  Å,  $b = 9.8381(9)$  Å,  $c = 12.6943(12)$  Å,  $\alpha = 98.4750(10)^\circ$ ,  $\beta = 107.9440(10)^\circ$ ,  $\gamma = 106.4410(10)^\circ$ ,  $V = 872.76(14)$  Å<sup>3</sup>,  $Z = 2$ ,  $T = 90$  K,  $\mu(MoK\alpha) = 0.157$  mm<sup>-1</sup>,  $D_{calc} = 1.288$  g/cm<sup>3</sup>, 10735 reflections measured ( $3.49^\circ \leq 2\theta \leq 58.356^\circ$ ), 4301 unique ( $R_{int} = 0.0236$ ,  $R_{sigma} = 0.0273$ ) which were used in all calculations. The final  $R_1$  was 0.0369 ( $I > 2\sigma(I)$ ) and  $wR_2$  was 0.0998 (all data).

**References**

- [1] Dolomanov, O. V., Bourhis, L. J., Gildea, R. J., Howard, J. A. K. & Puschmann, H. (2009). *J. Appl. Cryst.* 42, 339-341.
- [2] Sheldrick, G. M. (2008). *Acta Cryst.* A64, 112-122.
- [3] Sheldrick, G. M. (2015). *Acta Cryst.* A71, 3-8.

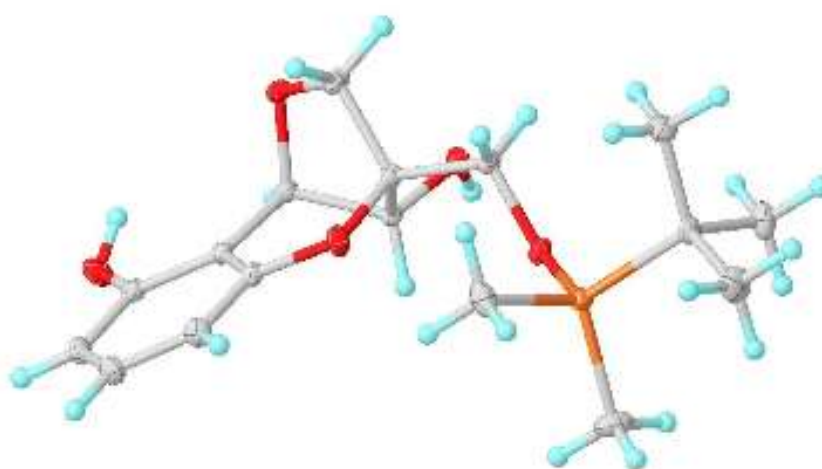

Fig. 1 ORTEP drawing of NA-1-66-2 with thermal ellipsoids at 50% probability level.

## supporting information

## NA-1-66-2

## Computing details

Cell refinement: *SAINT* V8.40B (2016); data reduction: *SAINT* V8.40B (2016); program(s) used to solve structure: *SHELXT* 2018/2 (Sheldrick, 2018); program(s) used to refine structure: *XL* (Sheldrick, 2008); molecular graphics: *Olex2* 1.5 (Dolomanov *et al.*, 2009); software used to prepare material for publication: *Olex2* 1.5 (Dolomanov *et al.*, 2009).

## Crystal data

$C_{17}H_{18}O_8Si$   
 $M_r = 338.47$   
 Triclinic,  $P\bar{1}$   
 $a = 7.9252$  (8) Å  
 $b = 9.8381$  (9) Å  
 $c = 12.6943$  (12) Å  
 $\alpha = 98.475$  (1)°  
 $\beta = 107.944$  (1)°  
 $\gamma = 106.441$  (1)°  
 $V = 872.76$  (14) Å<sup>3</sup>

## Data collection

Bruker SMART APEX II CCD area detector diffractometer  
 Radiation source: rotating-anode X-ray tube, Bruker TXS fine-focus Turbo X-ray Source  
 Bruker Helios multilayered confocal mirror monochromator  
 Detector resolution: 8.333 pixels mm<sup>-1</sup>  
 $\varphi$  and  $\omega$  scans

## Refinement

Refinement on  $F^2$   
 Least-squares matrix: full  
 $R[F^2 > 2\sigma(F^2)] = 0.037$   
 $wR(F^2) = 0.100$   
 $S = 1.04$   
 4301 reflections  
 215 parameters  
 191 restraints  
 Primary atom site location: dual

$Z = 2$   
 $F(000) = 364$   
 $D_x = 1.288$  Mg m<sup>-3</sup>  
 Mo  $K\alpha$  radiation,  $\lambda = 0.71073$  Å  
 Cell parameters from 6161 reflections  
 $\theta = 2.2$ – $29.0^\circ$   
 $\mu = 0.16$  mm<sup>-1</sup>  
 $T = 90$  K  
 Block, colourless  
 0.29 × 0.24 × 0.22 mm

Absorption correction: numerical  
*SADABS2016/2* (Bruker, 2016/2) was used for absorption correction.  $wR2(\text{int})$  was 0.0712 before and 0.0345 after correction. The Ratio of minimum to maximum transmission is 0.9425. The  $\lambda/2$  correction factor is Not present.  
 $T_{\text{min}} = 0.937$ ,  $T_{\text{max}} = 0.995$   
 10735 measured reflections  
 4301 independent reflections  
 3963 reflections with  $I > 2\sigma(I)$   
 $R_{\text{int}} = 0.024$   
 $\theta_{\text{max}} = 29.2^\circ$ ,  $\theta_{\text{min}} = 1.8^\circ$   
 $h = -10 \rightarrow 10$   
 $k = -13 \rightarrow 13$   
 $l = -16 \rightarrow 17$

Hydrogen site location: inferred from neighbouring sites  
 H-atom parameters constrained  
 $w = 1/[\sigma^2(F_o^2) + (0.0514P)^2 + 0.4171P]$  where  $P = (F_o^2 + 2F_c^2)/3$   
 $(\Delta/\sigma)_{\text{max}} < 0.001$   
 $\rho_{\text{max}} = 0.84$  e Å<sup>-3</sup>  
 $\rho_{\text{min}} = -0.22$  e Å<sup>-3</sup>

*Special details*

*Geometry.* All e.s.d.'s (except the e.s.d. in the dihedral angle between two l.s. planes) are estimated using the full covariance matrix. The cell e.s.d.'s are taken into account individually in the estimation of e.s.d.'s in distances, angles and torsion angles; correlations between e.s.d.'s in cell parameters are only used when they are defined by crystal symmetry. An approximate (isotropic) treatment of cell e.s.d.'s is used for estimating e.s.d.'s involving l.s. planes.

*Fractional atomic coordinates and isotropic or equivalent isotropic displacement parameters ( $\text{\AA}^2$ )*

|      | <i>x</i>     | <i>y</i>     | <i>z</i>     | $U_{\text{iso}}^*/U_{\text{eq}}$ |
|------|--------------|--------------|--------------|----------------------------------|
| C1   | 0.41958 (16) | 0.32816 (12) | 0.65413 (10) | 0.0114 (2)                       |
| C2   | 0.69958 (16) | 0.31042 (13) | 0.78648 (10) | 0.0130 (2)                       |
| C3   | 0.82504 (18) | 0.34150 (14) | 0.89825 (11) | 0.0166 (2)                       |
| H3   | 0.809448     | 0.397868     | 0.959736     | 0.020*                           |
| C4   | 0.97404 (18) | 0.28846 (14) | 0.91844 (11) | 0.0181 (2)                       |
| H4   | 1.061917     | 0.310194     | 0.994439     | 0.022*                           |
| C5   | 0.99654 (17) | 0.20413 (14) | 0.82920 (11) | 0.0168 (2)                       |
| H5   | 1.099961     | 0.169732     | 0.844064     | 0.020*                           |
| C6   | 0.86620 (16) | 0.17039 (13) | 0.71771 (10) | 0.0134 (2)                       |
| C7   | 0.71769 (16) | 0.22575 (12) | 0.69440 (10) | 0.0118 (2)                       |
| C8   | 0.57460 (16) | 0.20017 (12) | 0.57626 (10) | 0.0114 (2)                       |
| H8   | 0.622469     | 0.172965     | 0.514915     | 0.014*                           |
| C9   | 0.52323 (16) | 0.33838 (12) | 0.57007 (10) | 0.0112 (2)                       |
| H9   | 0.637304     | 0.429570     | 0.596546     | 0.013*                           |
| C10  | 0.30123 (17) | 0.16412 (13) | 0.61878 (11) | 0.0150 (2)                       |
| H10A | 0.294953     | 0.128626     | 0.686999     | 0.018*                           |
| H10B | 0.170826     | 0.145882     | 0.566256     | 0.018*                           |
| C11  | 0.30010 (16) | 0.42437 (12) | 0.65398 (10) | 0.0131 (2)                       |
| H11A | 0.198369     | 0.396461     | 0.577600     | 0.016*                           |
| H11B | 0.239966     | 0.408645     | 0.711063     | 0.016*                           |
| C12  | 0.47973 (19) | 0.63829 (16) | 0.92282 (11) | 0.0213 (3)                       |
| H12A | 0.594990     | 0.613737     | 0.937752     | 0.032*                           |
| H12B | 0.373019     | 0.550953     | 0.912880     | 0.032*                           |
| H12C | 0.497164     | 0.715557     | 0.987659     | 0.032*                           |
| C13  | 0.6338 (2)   | 0.86420 (15) | 0.80210 (13) | 0.0250 (3)                       |
| H13A | 0.659060     | 0.944041     | 0.867357     | 0.038*                           |
| H13B | 0.603761     | 0.897107     | 0.731591     | 0.038*                           |
| H13C | 0.746001     | 0.835989     | 0.813595     | 0.038*                           |
| C14  | 0.20446 (17) | 0.74743 (13) | 0.75585 (10) | 0.0138 (2)                       |
| C15  | 0.1543 (2)   | 0.78285 (16) | 0.63796 (12) | 0.0220 (3)                       |
| H15A | 0.039293     | 0.808017     | 0.621188     | 0.033*                           |
| H15B | 0.132691     | 0.697079     | 0.578616     | 0.033*                           |
| H15C | 0.258919     | 0.865946     | 0.639248     | 0.033*                           |
| C16  | 0.2347 (2)   | 0.88192 (15) | 0.84832 (12) | 0.0232 (3)                       |
| H16A | 0.338859     | 0.965790     | 0.850095     | 0.035*                           |
| H16B | 0.265782     | 0.859808     | 0.923285     | 0.035*                           |
| H16C | 0.118658     | 0.905669     | 0.830390     | 0.035*                           |
| C17  | 0.03720 (18) | 0.61865 (15) | 0.75205 (12) | 0.0207 (3)                       |
| H17A | -0.075101    | 0.647132     | 0.737908     | 0.031*                           |
| H17B | 0.068436     | 0.592504     | 0.825453     | 0.031*                           |
| H17C | 0.011491     | 0.534116     | 0.690347     | 0.031*                           |
| O1   | 0.55758 (12) | 0.36904 (9)  | 0.76998 (7)  | 0.01473 (18)                     |
| O2   | 0.89299 (12) | 0.08436 (10) | 0.63401 (8)  | 0.0186 (2)                       |

## supporting information

|     |              |              |             |              |
|-----|--------------|--------------|-------------|--------------|
| H2  | 0.788134     | 0.035962     | 0.581173    | 0.028*       |
| O3  | 0.39157 (12) | 0.32541 (10) | 0.46122 (7) | 0.01484 (18) |
| H3A | 0.449871     | 0.354570     | 0.419017    | 0.022*       |
| O4  | 0.39606 (12) | 0.09006 (9)  | 0.56154 (7) | 0.01302 (17) |
| O5  | 0.41267 (12) | 0.57573 (9)  | 0.68070 (7) | 0.01316 (17) |
| Si1 | 0.43041 (4)  | 0.70403 (3)  | 0.79027 (3) | 0.01146 (9)  |

### Atomic displacement parameters ( $\text{\AA}^2$ )

|     | $U_{11}$     | $U_{22}$     | $U_{33}$     | $U_{12}$     | $U_{13}$     | $U_{23}$     |
|-----|--------------|--------------|--------------|--------------|--------------|--------------|
| C1  | 0.0125 (5)   | 0.0105 (5)   | 0.0126 (5)   | 0.0052 (4)   | 0.0057 (4)   | 0.0031 (4)   |
| C2  | 0.0135 (5)   | 0.0120 (5)   | 0.0171 (5)   | 0.0062 (4)   | 0.0075 (4)   | 0.0062 (4)   |
| C3  | 0.0184 (6)   | 0.0178 (6)   | 0.0146 (5)   | 0.0075 (5)   | 0.0065 (4)   | 0.0040 (4)   |
| C4  | 0.0167 (6)   | 0.0193 (6)   | 0.0162 (5)   | 0.0059 (5)   | 0.0031 (4)   | 0.0058 (5)   |
| C5  | 0.0136 (5)   | 0.0173 (6)   | 0.0221 (6)   | 0.0081 (5)   | 0.0064 (4)   | 0.0076 (5)   |
| C6  | 0.0121 (5)   | 0.0107 (5)   | 0.0191 (5)   | 0.0038 (4)   | 0.0079 (4)   | 0.0040 (4)   |
| C7  | 0.0115 (5)   | 0.0102 (5)   | 0.0148 (5)   | 0.0038 (4)   | 0.0058 (4)   | 0.0041 (4)   |
| C8  | 0.0106 (5)   | 0.0100 (5)   | 0.0145 (5)   | 0.0037 (4)   | 0.0062 (4)   | 0.0026 (4)   |
| C9  | 0.0117 (5)   | 0.0106 (5)   | 0.0124 (5)   | 0.0044 (4)   | 0.0051 (4)   | 0.0037 (4)   |
| C10 | 0.0174 (6)   | 0.0107 (5)   | 0.0221 (6)   | 0.0061 (4)   | 0.0132 (5)   | 0.0043 (4)   |
| C11 | 0.0132 (5)   | 0.0103 (5)   | 0.0178 (5)   | 0.0056 (4)   | 0.0075 (4)   | 0.0028 (4)   |
| C12 | 0.0227 (6)   | 0.0299 (7)   | 0.0159 (6)   | 0.0150 (6)   | 0.0071 (5)   | 0.0082 (5)   |
| C13 | 0.0204 (6)   | 0.0167 (6)   | 0.0336 (8)   | -0.0010 (5)  | 0.0143 (6)   | -0.0009 (5)  |
| C14 | 0.0158 (5)   | 0.0128 (5)   | 0.0165 (5)   | 0.0079 (4)   | 0.0074 (4)   | 0.0051 (4)   |
| C15 | 0.0272 (7)   | 0.0251 (7)   | 0.0212 (6)   | 0.0165 (6)   | 0.0094 (5)   | 0.0119 (5)   |
| C16 | 0.0264 (7)   | 0.0208 (6)   | 0.0258 (7)   | 0.0135 (5)   | 0.0117 (5)   | 0.0013 (5)   |
| C17 | 0.0137 (6)   | 0.0208 (6)   | 0.0301 (7)   | 0.0068 (5)   | 0.0098 (5)   | 0.0091 (5)   |
| O1  | 0.0179 (4)   | 0.0177 (4)   | 0.0125 (4)   | 0.0119 (3)   | 0.0058 (3)   | 0.0032 (3)   |
| O2  | 0.0126 (4)   | 0.0201 (5)   | 0.0215 (5)   | 0.0081 (4)   | 0.0052 (3)   | -0.0015 (4)  |
| O3  | 0.0150 (4)   | 0.0185 (4)   | 0.0133 (4)   | 0.0072 (3)   | 0.0056 (3)   | 0.0071 (3)   |
| O4  | 0.0123 (4)   | 0.0092 (4)   | 0.0189 (4)   | 0.0036 (3)   | 0.0084 (3)   | 0.0018 (3)   |
| O5  | 0.0161 (4)   | 0.0101 (4)   | 0.0167 (4)   | 0.0062 (3)   | 0.0088 (3)   | 0.0044 (3)   |
| Si1 | 0.01136 (16) | 0.01067 (16) | 0.01308 (16) | 0.00427 (12) | 0.00538 (12) | 0.00245 (12) |

### Geometric parameters ( $\text{\AA}$ , $^\circ$ )

|        |             |          |             |
|--------|-------------|----------|-------------|
| C1—C9  | 1.5325 (16) | C11—O5   | 1.4286 (14) |
| C1—C10 | 1.5349 (16) | C12—H12A | 0.9800      |
| C1—C11 | 1.5164 (15) | C12—H12B | 0.9800      |
| C1—O1  | 1.4512 (14) | C12—H12C | 0.9800      |
| C2—C3  | 1.3878 (17) | C12—Si1  | 1.8603 (13) |
| C2—C7  | 1.4018 (16) | C13—H13A | 0.9800      |
| C2—O1  | 1.3786 (14) | C13—H13B | 0.9800      |
| C3—H3  | 0.9500      | C13—H13C | 0.9800      |
| C3—C4  | 1.3908 (18) | C13—Si1  | 1.8568 (14) |
| C4—H4  | 0.9500      | C14—C15  | 1.5443 (17) |
| C4—C5  | 1.3908 (18) | C14—C16  | 1.5413 (17) |
| C5—H5  | 0.9500      | C14—C17  | 1.5350 (17) |
| C5—C6  | 1.3954 (17) | C14—Si1  | 1.8936 (12) |
| C6—C7  | 1.4018 (16) | C15—H15A | 0.9800      |
| C6—O2  | 1.3659 (14) | C15—H15B | 0.9800      |
| C7—C8  | 1.5092 (16) | C15—H15C | 0.9800      |

## supporting information

|               |             |               |             |
|---------------|-------------|---------------|-------------|
| C8—H8         | 1.0000      | C16—H16A      | 0.9800      |
| C8—C9         | 1.5316 (16) | C16—H16B      | 0.9800      |
| C8—O4         | 1.4562 (13) | C16—H16C      | 0.9800      |
| C9—H9         | 1.0000      | C17—H17A      | 0.9800      |
| C9—O3         | 1.4137 (13) | C17—H17B      | 0.9800      |
| C10—H10A      | 0.9900      | C17—H17C      | 0.9800      |
| C10—H10B      | 0.9900      | O2—H2         | 0.8400      |
| C10—O4        | 1.4540 (13) | O3—H3A        | 0.8400      |
| C11—H11A      | 0.9900      | O5—Si1        | 1.6761 (9)  |
| C11—H11B      | 0.9900      |               |             |
|               |             |               |             |
| C9—C1—C10     | 102.12 (9)  | H12A—C12—H12B | 109.5       |
| C11—C1—C9     | 116.46 (10) | H12A—C12—H12C | 109.5       |
| C11—C1—C10    | 112.46 (10) | H12B—C12—H12C | 109.5       |
| O1—C1—C9      | 109.06 (9)  | Si1—C12—H12A  | 109.5       |
| O1—C1—C10     | 110.39 (9)  | Si1—C12—H12B  | 109.5       |
| O1—C1—C11     | 106.32 (9)  | Si1—C12—H12C  | 109.5       |
| C3—C2—C7      | 121.84 (11) | H13A—C13—H13B | 109.5       |
| O1—C2—C3      | 116.70 (10) | H13A—C13—H13C | 109.5       |
| O1—C2—C7      | 121.44 (10) | H13B—C13—H13C | 109.5       |
| C2—C3—H3      | 120.7       | Si1—C13—H13A  | 109.5       |
| C2—C3—C4      | 118.66 (11) | Si1—C13—H13B  | 109.5       |
| C4—C3—H3      | 120.7       | Si1—C13—H13C  | 109.5       |
| C3—C4—H4      | 119.4       | C15—C14—Si1   | 109.53 (8)  |
| C3—C4—C5      | 121.10 (12) | C16—C14—C15   | 109.12 (10) |
| C5—C4—H4      | 119.4       | C16—C14—Si1   | 109.12 (9)  |
| C4—C5—H5      | 120.2       | C17—C14—C15   | 108.39 (10) |
| C4—C5—C6      | 119.56 (11) | C17—C14—C16   | 108.65 (11) |
| C6—C5—H5      | 120.2       | C17—C14—Si1   | 111.99 (8)  |
| C5—C6—C7      | 120.55 (11) | C14—C15—H15A  | 109.5       |
| O2—C6—C5      | 116.95 (10) | C14—C15—H15B  | 109.5       |
| O2—C6—C7      | 122.49 (11) | C14—C15—H15C  | 109.5       |
| C2—C7—C6      | 118.23 (11) | H15A—C15—H15B | 109.5       |
| C2—C7—C8      | 117.39 (10) | H15A—C15—H15C | 109.5       |
| C6—C7—C8      | 124.38 (10) | H15B—C15—H15C | 109.5       |
| C7—C8—H8      | 111.8       | C14—C16—H16A  | 109.5       |
| C7—C8—C9      | 108.33 (9)  | C14—C16—H16B  | 109.5       |
| C9—C8—H8      | 111.8       | C14—C16—H16C  | 109.5       |
| O4—C8—C7      | 109.77 (9)  | H16A—C16—H16B | 109.5       |
| O4—C8—H8      | 111.8       | H16A—C16—H16C | 109.5       |
| O4—C8—C9      | 102.83 (9)  | H16B—C16—H16C | 109.5       |
| C1—C9—H9      | 112.6       | C14—C17—H17A  | 109.5       |
| C8—C9—C1      | 97.77 (9)   | C14—C17—H17B  | 109.5       |
| C8—C9—H9      | 112.6       | C14—C17—H17C  | 109.5       |
| O3—C9—C1      | 108.04 (9)  | H17A—C17—H17B | 109.5       |
| O3—C9—C8      | 112.36 (9)  | H17A—C17—H17C | 109.5       |
| O3—C9—H9      | 112.6       | H17B—C17—H17C | 109.5       |
| C1—C10—H10A   | 110.5       | C2—O1—C1      | 116.40 (9)  |
| C1—C10—H10B   | 110.5       | C6—O2—H2      | 109.5       |
| H10A—C10—H10B | 108.7       | C9—O3—H3A     | 109.5       |
| O4—C10—C1     | 106.13 (9)  | C10—O4—C8     | 106.73 (8)  |
| O4—C10—H10A   | 110.5       | C11—O5—Si1    | 123.83 (7)  |



## supporting information

|               |              |                 |              |
|---------------|--------------|-----------------|--------------|
| O4—C10—H10B   | 110.5        | C12—Si1—C14     | 110.84 (6)   |
| C1—C11—H11A   | 109.4        | C13—Si1—C12     | 111.14 (7)   |
| C1—C11—H11B   | 109.4        | C13—Si1—C14     | 111.42 (6)   |
| H11A—C11—H11B | 108.0        | O5—Si1—C12      | 109.57 (5)   |
| O5—C11—C1     | 111.01 (9)   | O5—Si1—C13      | 103.71 (6)   |
| O5—C11—H11A   | 109.4        | O5—Si1—C14      | 109.93 (5)   |
| O5—C11—H11B   | 109.4        |                 |              |
|               |              |                 |              |
| C1—C10—O4—C8  | 7.58 (12)    | C11—C1—C9—C8    | -165.50 (10) |
| C1—C11—O5—Si1 | -122.69 (9)  | C11—C1—C9—O3    | -48.87 (13)  |
| C2—C3—C4—C5   | -0.90 (19)   | C11—C1—C10—O4   | 148.73 (10)  |
| C2—C7—C8—C9   | 35.15 (13)   | C11—C1—O1—C2    | -170.88 (9)  |
| C2—C7—C8—O4   | -76.42 (12)  | C11—O5—Si1—C12  | 48.40 (10)   |
| C3—C2—C7—C6   | 0.77 (18)    | C11—O5—Si1—C13  | 167.13 (9)   |
| C3—C2—C7—C8   | -179.33 (11) | C11—O5—Si1—C14  | -73.64 (10)  |
| C3—C2—O1—C1   | -176.03 (10) | C15—C14—Si1—C12 | -172.96 (9)  |
| C3—C4—C5—C6   | -0.86 (19)   | C15—C14—Si1—C13 | 62.72 (10)   |
| C4—C5—C6—C7   | 2.63 (18)    | C15—C14—Si1—O5  | -51.67 (10)  |
| C4—C5—C6—O2   | -178.50 (11) | C16—C14—Si1—C12 | 67.65 (10)   |
| C5—C6—C7—C2   | -2.57 (17)   | C16—C14—Si1—C13 | -56.67 (11)  |
| C5—C6—C7—C8   | 177.55 (11)  | C16—C14—Si1—O5  | -171.07 (8)  |
| C6—C7—C8—C9   | -144.97 (11) | C17—C14—Si1—C12 | -52.68 (11)  |
| C6—C7—C8—O4   | 103.46 (12)  | C17—C14—Si1—C13 | -177.00 (9)  |
| C7—C2—C3—C4   | 0.94 (18)    | C17—C14—Si1—O5  | 68.60 (10)   |
| C7—C2—O1—C1   | 5.01 (16)    | O1—C1—C9—C8     | 74.23 (10)   |
| C7—C8—C9—C1   | -67.80 (10)  | O1—C1—C9—O3     | -169.14 (8)  |
| C7—C8—C9—O3   | 178.99 (9)   | O1—C1—C10—O4    | -92.72 (11)  |
| C7—C8—O4—C10  | 79.53 (11)   | O1—C1—C11—O5    | 62.47 (12)   |
| C9—C1—C10—O4  | 23.13 (11)   | O1—C2—C3—C4     | -178.01 (11) |
| C9—C1—C11—O5  | -59.25 (13)  | O1—C2—C7—C6     | 179.67 (10)  |
| C9—C1—O1—C2   | -44.55 (12)  | O1—C2—C7—C8     | -0.44 (16)   |
| C9—C8—O4—C10  | -35.60 (11)  | O2—C6—C7—C2     | 178.62 (11)  |
| C10—C1—C9—C8  | -42.59 (10)  | O2—C6—C7—C8     | -1.26 (18)   |
| C10—C1—C9—O3  | 74.04 (11)   | O4—C8—C9—C1     | 48.37 (10)   |
| C10—C1—C11—O5 | -176.61 (9)  | O4—C8—C9—O3     | -64.85 (11)  |
| C10—C1—O1—C2  | 66.88 (12)   |                 |              |

NOESY data of the corresponding acetonides **S5** and **S5'**.

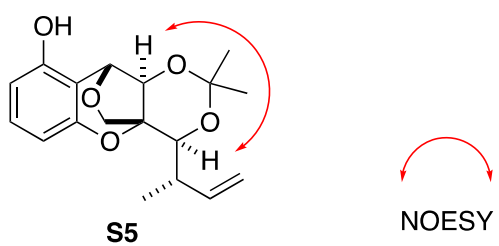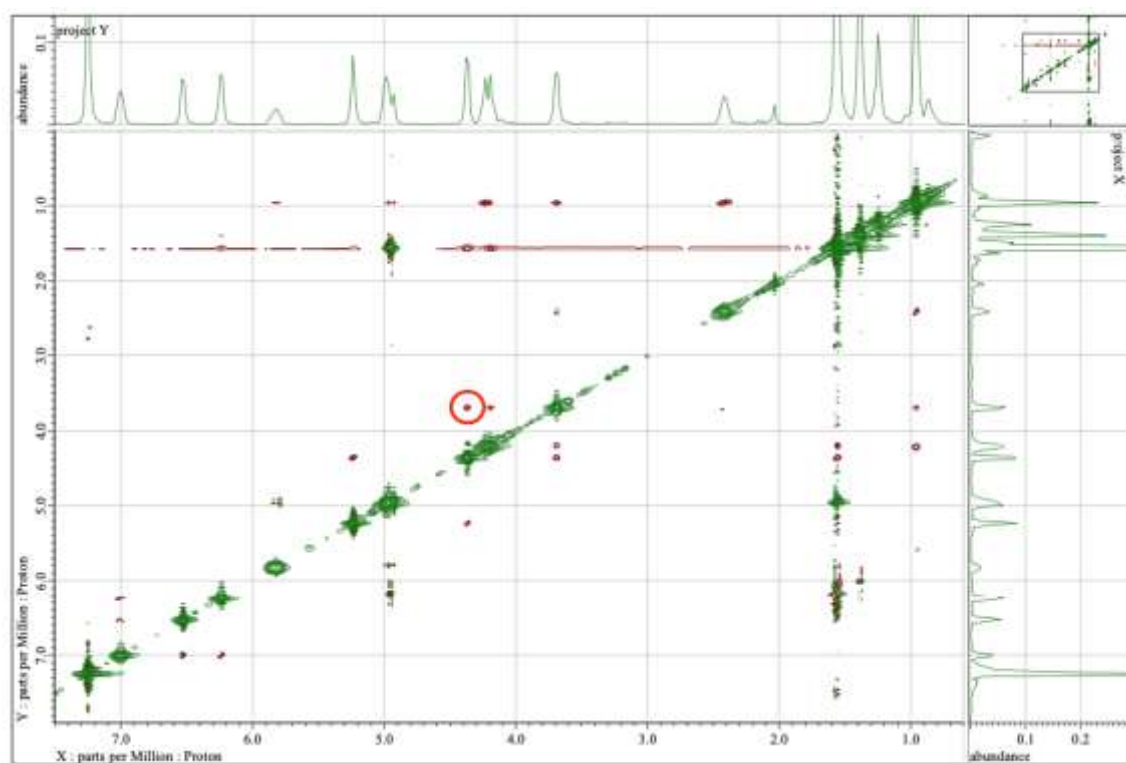

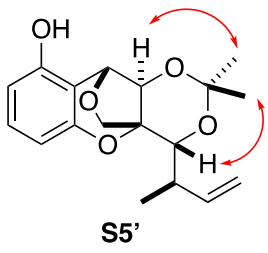

NOESY

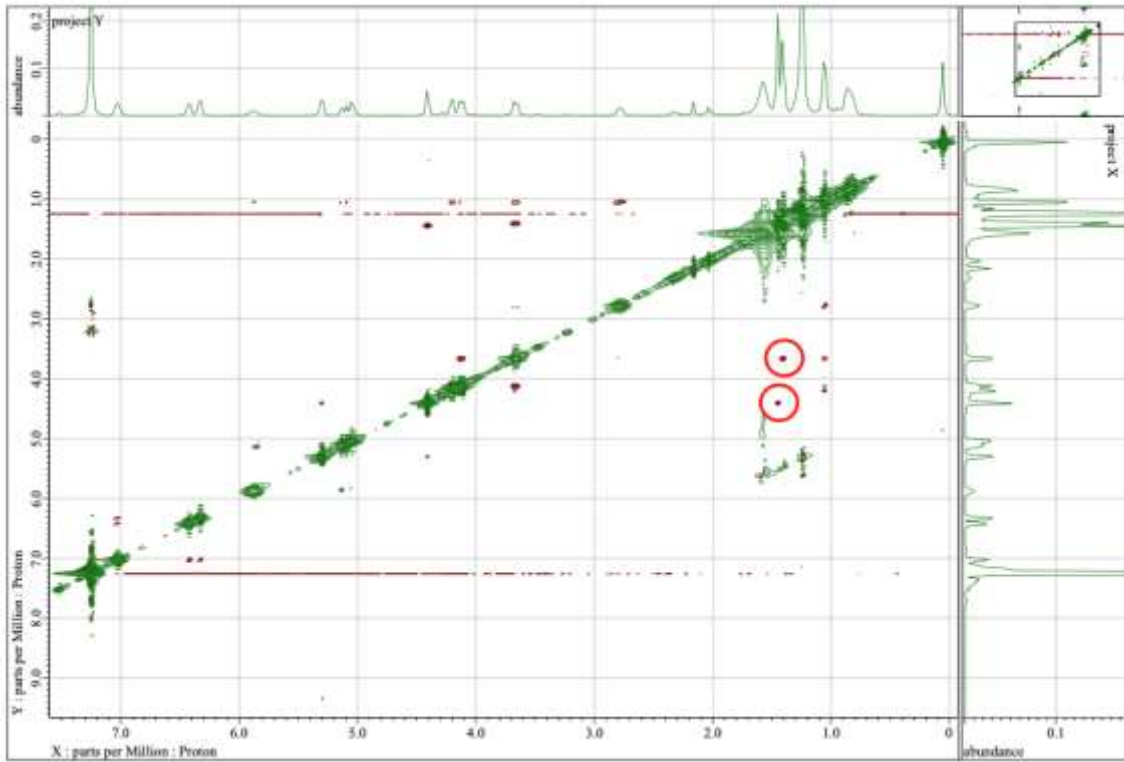

NOESY data of phomopsol B (2) and its diastereomer 2'

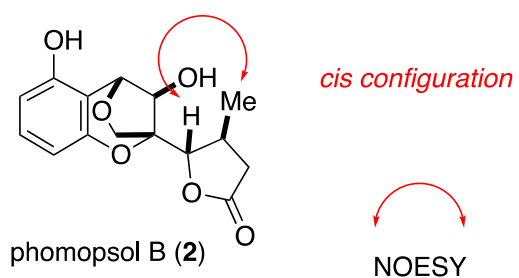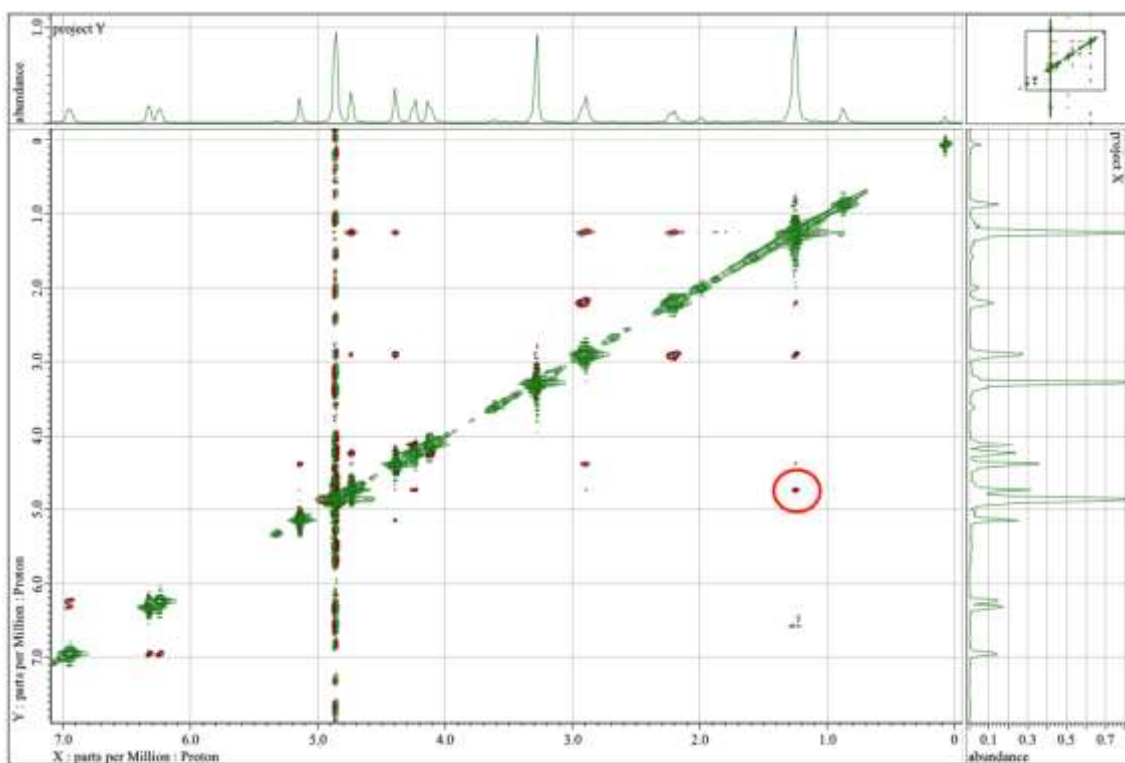

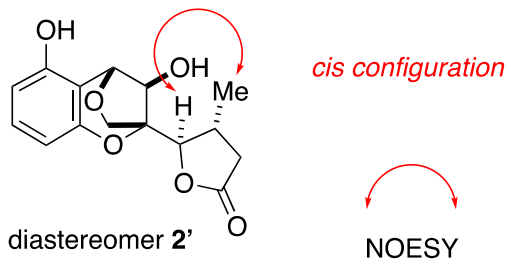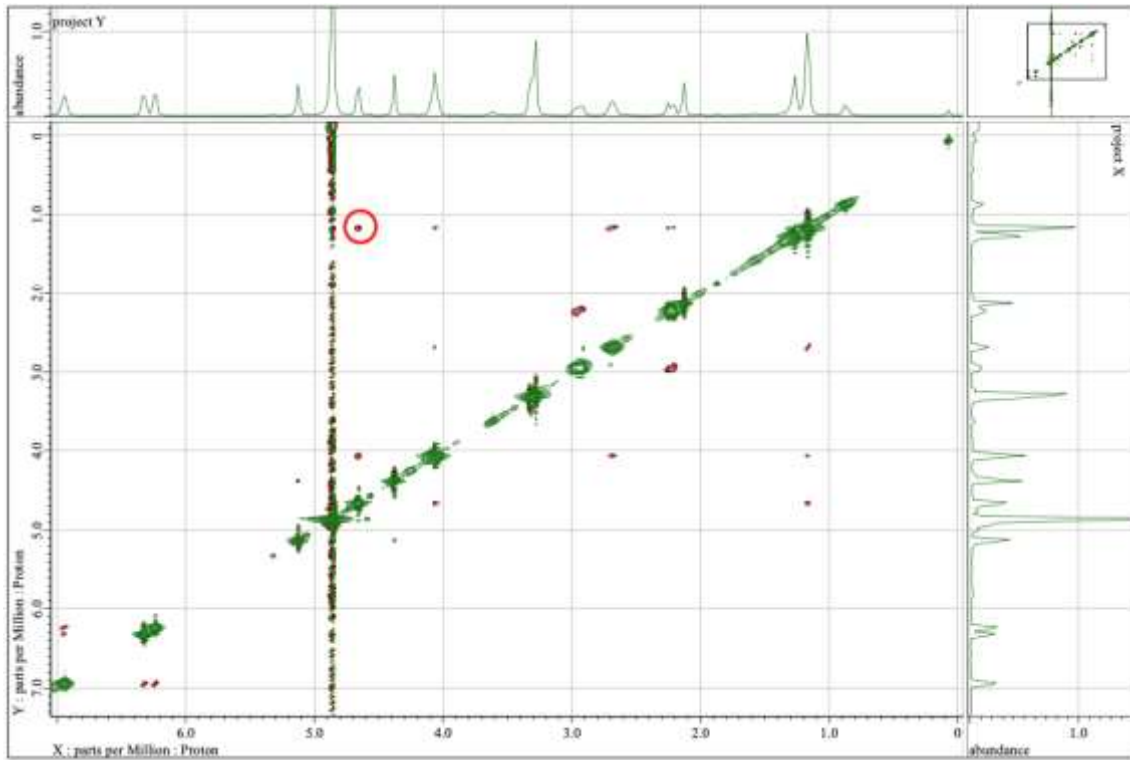

Supplement: d3cc05130g1.pdf [file d3cc05130g1.pdf]
